# Supplementary material for: Cell adaptation of the extremophilic red microalga Galdieria sulphuraria to the availability of carbon sources
Source: Front Plant Sci. 2022 Sep 15;13:978246. doi: 10.3389/fpls.2022.978246 (PMC9520601; doi:10.3389/fpls.2022.978246)
Supplement: Supplementary Table 6 — Gene Ontology (GO) analyses (GluvsGly, HTvsPHOT, GluvsPHOT, GlyvsPHOT). [file Table_6.XLSX]

## Sheet: GLUvsGLY_All-GO
Category	GOID	Description	GeneRatio	BgRatio	pvalue	padj	geneID	geneName	Count	Up	Up_Gene_id	Down	Down_Gene_id
BP	GO:0015979	photosynthesis	1934-06-01	27/1687	9.26996069665288e-06	0.000787946659215495	17087980/17088679/17087383/17087291/17087333/17087332	Gasu_33650/Gasu_27020/Gasu_40700/Gasu_40040/Gasu_40460/Gasu_40450	6	0		6	17087980/17088679/17087383/17087291/17087333/17087332
BP	GO:0055085	transmembrane transport	1934-12-01	180/1687	0.000100980159897479	0.00429165679564288	17084799/17091131/17086900/17089057/17089888/17089719/17085028/17085246/17086030/17085337/17085877/17089031	Gasu_65340/Gasu_03350/Gasu_45290/Gasu_23540/Gasu_14680/Gasu_17920/Gasu_63100/Gasu_61030/Gasu_53180/Gasu_60060/Gasu_54580/Gasu_24410	12	1	17086030	11	17084799/17091131/17086900/17089057/17089888/17089719/17085028/17085246/17085337/17085877/17089031
BP	GO:0006810	transport	14/34	304/1687	0.00123026424926005	0.0223786513810112	17084799/17091131/17086900/17089057/17089888/17088854/17089719/17087077/17085028/17085246/17086030/17085337/17085877/17089031	Gasu_65340/Gasu_03350/Gasu_45290/Gasu_23540/Gasu_14680/Gasu_24830/Gasu_17920/Gasu_42250/Gasu_63100/Gasu_61030/Gasu_53180/Gasu_60060/Gasu_54580/Gasu_24410	14	1	17086030	13	17084799/17091131/17086900/17089057/17089888/17088854/17089719/17087077/17085028/17085246/17085337/17085877/17089031
BP	GO:0051234	establishment of localization	14/34	304/1687	0.00123026424926005	0.0223786513810112	17084799/17091131/17086900/17089057/17089888/17088854/17089719/17087077/17085028/17085246/17086030/17085337/17085877/17089031	Gasu_65340/Gasu_03350/Gasu_45290/Gasu_23540/Gasu_14680/Gasu_24830/Gasu_17920/Gasu_42250/Gasu_63100/Gasu_61030/Gasu_53180/Gasu_60060/Gasu_54580/Gasu_24410	14	1	17086030	13	17084799/17091131/17086900/17089057/17089888/17088854/17089719/17087077/17085028/17085246/17085337/17085877/17089031
BP	GO:0051179	localization	14/34	306/1687	0.00131639125770654	0.0223786513810112	17084799/17091131/17086900/17089057/17089888/17088854/17089719/17087077/17085028/17085246/17086030/17085337/17085877/17089031	Gasu_65340/Gasu_03350/Gasu_45290/Gasu_23540/Gasu_14680/Gasu_24830/Gasu_17920/Gasu_42250/Gasu_63100/Gasu_61030/Gasu_53180/Gasu_60060/Gasu_54580/Gasu_24410	14	1	17086030	13	17084799/17091131/17086900/17089057/17089888/17088854/17089719/17087077/17085028/17085246/17085337/17085877/17089031
CC	GO:0044425	membrane part	21/27	295/801	1.24439842122987e-05	0.000385763510581258	17087980/17091131/17088679/17090627/17086900/17089057/17089888/17089719/17090556/17085028/17085246/17090626/17085673/17086030/17085337/17086617/17087383/17087291/17089031/17087333/17087332	Gasu_33650/Gasu_03350/Gasu_27020/Gasu_07700/Gasu_45290/Gasu_23540/Gasu_14680/Gasu_17920/Gasu_10120/Gasu_63100/Gasu_61030/Gasu_07690/Gasu_57190/Gasu_53180/Gasu_60060/Gasu_47190/Gasu_40700/Gasu_40040/Gasu_24410/Gasu_40460/Gasu_40450	21	1	17086030	20	17087980/17091131/17088679/17090627/17086900/17089057/17089888/17089719/17090556/17085028/17085246/17090626/17085673/17085337/17086617/17087383/17087291/17089031/17087333/17087332
CC	GO:0009579	thylakoid	2027-06-01	25/801	9.40167663480407e-05	0.000728629939197315	17087980/17088679/17087383/17087291/17087333/17087332	Gasu_33650/Gasu_27020/Gasu_40700/Gasu_40040/Gasu_40460/Gasu_40450	6	0		6	17087980/17088679/17087383/17087291/17087333/17087332
CC	GO:0034357	photosynthetic membrane	2027-06-01	25/801	9.40167663480407e-05	0.000728629939197315	17087980/17088679/17087383/17087291/17087333/17087332	Gasu_33650/Gasu_27020/Gasu_40700/Gasu_40040/Gasu_40460/Gasu_40450	6	0		6	17087980/17088679/17087383/17087291/17087333/17087332
CC	GO:0044436	thylakoid part	2027-06-01	25/801	9.40167663480407e-05	0.000728629939197315	17087980/17088679/17087383/17087291/17087333/17087332	Gasu_33650/Gasu_27020/Gasu_40700/Gasu_40040/Gasu_40460/Gasu_40450	6	0		6	17087980/17088679/17087383/17087291/17087333/17087332
CC	GO:0016020	membrane	24/27	437/801	0.000123843433758712	0.000767829289304013	17087980/17084799/17091131/17088679/17090627/17086900/17089057/17089888/17088854/17089719/17090556/17085028/17085246/17090626/17085673/17086030/17085337/17086617/17087383/17085877/17087291/17089031/17087333/17087332	Gasu_33650/Gasu_65340/Gasu_03350/Gasu_27020/Gasu_07700/Gasu_45290/Gasu_23540/Gasu_14680/Gasu_24830/Gasu_17920/Gasu_10120/Gasu_63100/Gasu_61030/Gasu_07690/Gasu_57190/Gasu_53180/Gasu_60060/Gasu_47190/Gasu_40700/Gasu_54580/Gasu_40040/Gasu_24410/Gasu_40460/Gasu_40450	24	1	17086030	23	17087980/17084799/17091131/17088679/17090627/17086900/17089057/17089888/17088854/17089719/17090556/17085028/17085246/17090626/17085673/17085337/17086617/17087383/17085877/17087291/17089031/17087333/17087332
CC	GO:0016021	integral component of membrane	17/27	240/801	0.000310631565716041	0.00137565407674247	17091131/17090627/17086900/17089057/17089888/17089719/17090556/17085028/17085246/17090626/17085673/17086030/17085337/17086617/17089031/17087333/17087332	Gasu_03350/Gasu_07700/Gasu_45290/Gasu_23540/Gasu_14680/Gasu_17920/Gasu_10120/Gasu_63100/Gasu_61030/Gasu_07690/Gasu_57190/Gasu_53180/Gasu_60060/Gasu_47190/Gasu_24410/Gasu_40460/Gasu_40450	17	1	17086030	16	17091131/17090627/17086900/17089057/17089888/17089719/17090556/17085028/17085246/17090626/17085673/17085337/17086617/17089031/17087333/17087332
CC	GO:0031224	intrinsic component of membrane	17/27	240/801	0.000310631565716041	0.00137565407674247	17091131/17090627/17086900/17089057/17089888/17089719/17090556/17085028/17085246/17090626/17085673/17086030/17085337/17086617/17089031/17087333/17087332	Gasu_03350/Gasu_07700/Gasu_45290/Gasu_23540/Gasu_14680/Gasu_17920/Gasu_10120/Gasu_63100/Gasu_61030/Gasu_07690/Gasu_57190/Gasu_53180/Gasu_60060/Gasu_47190/Gasu_24410/Gasu_40460/Gasu_40450	17	1	17086030	16	17091131/17090627/17086900/17089057/17089888/17089719/17090556/17085028/17085246/17090626/17085673/17085337/17086617/17089031/17087333/17087332
CC	GO:0009521	photosystem	2027-04-01	14/801	0.000816949680097649	0.00316568001037839	17088679/17087383/17087333/17087332	Gasu_27020/Gasu_40700/Gasu_40460/Gasu_40450	4	0		4	17088679/17087383/17087333/17087332
CC	GO:0098796	membrane protein complex	2027-06-01	60/801	0.011730929033811	0.0368019263941952	17087980/17088679/17087383/17087291/17087333/17087332	Gasu_33650/Gasu_27020/Gasu_40700/Gasu_40040/Gasu_40460/Gasu_40450	6	0		6	17087980/17088679/17087383/17087291/17087333/17087332
CC	GO:0042651	thylakoid membrane	2027-03-01	15/801	0.0118715891594178	0.0368019263941952	17087980/17088679/17087291	Gasu_33650/Gasu_27020/Gasu_40040	3	0		3	17087980/17088679/17087291
MF	GO:0022857	transmembrane transporter activity	2029-12-01	154/2550	3.27816644869502e-08	1.31126657947801e-06	17084799/17091131/17086900/17089057/17089888/17088854/17089719/17085028/17085246/17086030/17085337/17089031	Gasu_65340/Gasu_03350/Gasu_45290/Gasu_23540/Gasu_14680/Gasu_24830/Gasu_17920/Gasu_63100/Gasu_61030/Gasu_53180/Gasu_60060/Gasu_24410	12	1	17086030	11	17084799/17091131/17086900/17089057/17089888/17088854/17089719/17085028/17085246/17085337/17089031
MF	GO:0005215	transporter activity	2029-12-01	165/2550	7.19633506784904e-08	1.43926701356981e-06	17084799/17091131/17086900/17089057/17089888/17088854/17089719/17085028/17085246/17086030/17085337/17089031	Gasu_65340/Gasu_03350/Gasu_45290/Gasu_23540/Gasu_14680/Gasu_24830/Gasu_17920/Gasu_63100/Gasu_61030/Gasu_53180/Gasu_60060/Gasu_24410	12	1	17086030	11	17084799/17091131/17086900/17089057/17089888/17088854/17089719/17085028/17085246/17085337/17089031

## Sheet: HTvsPHOT_All-GO
Category	GOID	Description	GeneRatio	BgRatio	pvalue	padj	geneID	geneName	Count	Up	Up_Gene_id	Down	Down_Gene_id
BP	GO:0015979	photosynthesis	24/360	27/1688	6.46450425681935e-14	1.70016461954349e-11	17087302/17087333/17089797/17087343/17087815/17087376/17088681/17087331/17085313/17087342/17087006/17087291/17087980/17087332/17087290/17088679/17084837/17087297/17087359/17087296/17087355/17087386/17087295/17087356	Gasu_40150/Gasu_40460/Gasu_16200/Gasu_40550/Gasu_35550/Gasu_40270/Gasu_27040/Gasu_40440/Gasu_60110/Gasu_40540/Gasu_43120/Gasu_40040/Gasu_33650/Gasu_40450/Gasu_40030/Gasu_27020/Gasu_64970/Gasu_40100/Gasu_40710/Gasu_40090/Gasu_40670/Gasu_40480/Gasu_40080/Gasu_40680	24	0		24	17087302/17087333/17089797/17087343/17087815/17087376/17088681/17087331/17085313/17087342/17087006/17087291/17087980/17087332/17087290/17088679/17084837/17087297/17087359/17087296/17087355/17087386/17087295/17087356
BP	GO:0006412	translation	61/360	148/1688	7.01112395667924e-09	9.2196280030332e-07	17086993/17089592/17088507/17089351/17087457/17089314/17085569/17089664/17091218/17089549/17088038/17088991/17085756/17085589/17090801/17086388/17089554/17089814/17089562/17090783/17089425/17090877/17090240/17090031/17086085/17090666/17086915/17087946/17089833/17087667/17088459/17089063/17086423/17088649/17085568/17087751/17087738/17086225/17085200/17087881/17086149/17085958/17085943/17090558/170…	Gasu_42990/Gasu_19110/Gasu_29510/Gasu_20930/Gasu_39740/Gasu_20560/Gasu_57270/Gasu_17370/Gasu_00280/Gasu_18680/Gasu_34220/Gasu_24010/Gasu_55950/Gasu_57470/Gasu_06180/Gasu_49340/Gasu_18730/Gasu_16370/Gasu_18810/Gasu_06000/Gasu_19580/Gasu_06940/Gasu_12760/Gasu_13470/Gasu_52570/Gasu_08090/Gasu_43860/Gasu_35130/Gasu_16560/Gasu_37110/Gasu_29040/Gasu_22380/Gasu_49690/Gasu_26720/Gasu_57260/Gasu_36510/Gas…	61	50	17086993/17089592/17088507/17089351/17087457/17089314/17085569/17089664/17091218/17089549/17088038/17088991/17085756/17085589/17090801/17086388/17089554/17089814/17089562/17090783/17089425/17090877/17090240/17090031/17086085/17090666/17086915/17087946/17089833/17087667/17088459/17089063/17086423/17088649/17085568/17087751/17087738/17086225/17085200/17087881/17086149/17085958/17085943/17090558/170…	11	17087322/17087325/17087320/17087324/17087326/17087307/17087323/17087348/17087319/17087318/17087349
BP	GO:0043043	peptide biosynthetic process	61/360	151/1688	1.78821400088068e-08	1.56766760743873e-06	17086993/17089592/17088507/17089351/17087457/17089314/17085569/17089664/17091218/17089549/17088038/17088991/17085756/17085589/17090801/17086388/17089554/17089814/17089562/17090783/17089425/17090877/17090240/17090031/17086085/17090666/17086915/17087946/17089833/17087667/17088459/17089063/17086423/17088649/17085568/17087751/17087738/17086225/17085200/17087881/17086149/17085958/17085943/17090558/170…	Gasu_42990/Gasu_19110/Gasu_29510/Gasu_20930/Gasu_39740/Gasu_20560/Gasu_57270/Gasu_17370/Gasu_00280/Gasu_18680/Gasu_34220/Gasu_24010/Gasu_55950/Gasu_57470/Gasu_06180/Gasu_49340/Gasu_18730/Gasu_16370/Gasu_18810/Gasu_06000/Gasu_19580/Gasu_06940/Gasu_12760/Gasu_13470/Gasu_52570/Gasu_08090/Gasu_43860/Gasu_35130/Gasu_16560/Gasu_37110/Gasu_29040/Gasu_22380/Gasu_49690/Gasu_26720/Gasu_57260/Gasu_36510/Gas…	61	50	17086993/17089592/17088507/17089351/17087457/17089314/17085569/17089664/17091218/17089549/17088038/17088991/17085756/17085589/17090801/17086388/17089554/17089814/17089562/17090783/17089425/17090877/17090240/17090031/17086085/17090666/17086915/17087946/17089833/17087667/17088459/17089063/17086423/17088649/17085568/17087751/17087738/17086225/17085200/17087881/17086149/17085958/17085943/17090558/170…	11	17087322/17087325/17087320/17087324/17087326/17087307/17087323/17087348/17087319/17087318/17087349
BP	GO:0006518	peptide metabolic process	61/360	154/1688	4.37738240229302e-08	2.87812892950766e-06	17086993/17089592/17088507/17089351/17087457/17089314/17085569/17089664/17091218/17089549/17088038/17088991/17085756/17085589/17090801/17086388/17089554/17089814/17089562/17090783/17089425/17090877/17090240/17090031/17086085/17090666/17086915/17087946/17089833/17087667/17088459/17089063/17086423/17088649/17085568/17087751/17087738/17086225/17085200/17087881/17086149/17085958/17085943/17090558/170…	Gasu_42990/Gasu_19110/Gasu_29510/Gasu_20930/Gasu_39740/Gasu_20560/Gasu_57270/Gasu_17370/Gasu_00280/Gasu_18680/Gasu_34220/Gasu_24010/Gasu_55950/Gasu_57470/Gasu_06180/Gasu_49340/Gasu_18730/Gasu_16370/Gasu_18810/Gasu_06000/Gasu_19580/Gasu_06940/Gasu_12760/Gasu_13470/Gasu_52570/Gasu_08090/Gasu_43860/Gasu_35130/Gasu_16560/Gasu_37110/Gasu_29040/Gasu_22380/Gasu_49690/Gasu_26720/Gasu_57260/Gasu_36510/Gas…	61	50	17086993/17089592/17088507/17089351/17087457/17089314/17085569/17089664/17091218/17089549/17088038/17088991/17085756/17085589/17090801/17086388/17089554/17089814/17089562/17090783/17089425/17090877/17090240/17090031/17086085/17090666/17086915/17087946/17089833/17087667/17088459/17089063/17086423/17088649/17085568/17087751/17087738/17086225/17085200/17087881/17086149/17085958/17085943/17090558/170…	11	17087322/17087325/17087320/17087324/17087326/17087307/17087323/17087348/17087319/17087318/17087349
BP	GO:0043604	amide biosynthetic process	61/360	157/1688	1.0305326321429e-07	5.42060164507168e-06	17086993/17089592/17088507/17089351/17087457/17089314/17085569/17089664/17091218/17089549/17088038/17088991/17085756/17085589/17090801/17086388/17089554/17089814/17089562/17090783/17089425/17090877/17090240/17090031/17086085/17090666/17086915/17087946/17089833/17087667/17088459/17089063/17086423/17088649/17085568/17087751/17087738/17086225/17085200/17087881/17086149/17085958/17085943/17090558/170…	Gasu_42990/Gasu_19110/Gasu_29510/Gasu_20930/Gasu_39740/Gasu_20560/Gasu_57270/Gasu_17370/Gasu_00280/Gasu_18680/Gasu_34220/Gasu_24010/Gasu_55950/Gasu_57470/Gasu_06180/Gasu_49340/Gasu_18730/Gasu_16370/Gasu_18810/Gasu_06000/Gasu_19580/Gasu_06940/Gasu_12760/Gasu_13470/Gasu_52570/Gasu_08090/Gasu_43860/Gasu_35130/Gasu_16560/Gasu_37110/Gasu_29040/Gasu_22380/Gasu_49690/Gasu_26720/Gasu_57260/Gasu_36510/Gas…	61	50	17086993/17089592/17088507/17089351/17087457/17089314/17085569/17089664/17091218/17089549/17088038/17088991/17085756/17085589/17090801/17086388/17089554/17089814/17089562/17090783/17089425/17090877/17090240/17090031/17086085/17090666/17086915/17087946/17089833/17087667/17088459/17089063/17086423/17088649/17085568/17087751/17087738/17086225/17085200/17087881/17086149/17085958/17085943/17090558/170…	11	17087322/17087325/17087320/17087324/17087326/17087307/17087323/17087348/17087319/17087318/17087349
BP	GO:0043603	cellular amide metabolic process	61/360	162/1688	3.95686737115316e-07	1.73442686435547e-05	17086993/17089592/17088507/17089351/17087457/17089314/17085569/17089664/17091218/17089549/17088038/17088991/17085756/17085589/17090801/17086388/17089554/17089814/17089562/17090783/17089425/17090877/17090240/17090031/17086085/17090666/17086915/17087946/17089833/17087667/17088459/17089063/17086423/17088649/17085568/17087751/17087738/17086225/17085200/17087881/17086149/17085958/17085943/17090558/170…	Gasu_42990/Gasu_19110/Gasu_29510/Gasu_20930/Gasu_39740/Gasu_20560/Gasu_57270/Gasu_17370/Gasu_00280/Gasu_18680/Gasu_34220/Gasu_24010/Gasu_55950/Gasu_57470/Gasu_06180/Gasu_49340/Gasu_18730/Gasu_16370/Gasu_18810/Gasu_06000/Gasu_19580/Gasu_06940/Gasu_12760/Gasu_13470/Gasu_52570/Gasu_08090/Gasu_43860/Gasu_35130/Gasu_16560/Gasu_37110/Gasu_29040/Gasu_22380/Gasu_49690/Gasu_26720/Gasu_57260/Gasu_36510/Gas…	61	50	17086993/17089592/17088507/17089351/17087457/17089314/17085569/17089664/17091218/17089549/17088038/17088991/17085756/17085589/17090801/17086388/17089554/17089814/17089562/17090783/17089425/17090877/17090240/17090031/17086085/17090666/17086915/17087946/17089833/17087667/17088459/17089063/17086423/17088649/17085568/17087751/17087738/17086225/17085200/17087881/17086149/17085958/17085943/17090558/170…	11	17087322/17087325/17087320/17087324/17087326/17087307/17087323/17087348/17087319/17087318/17087349
BP	GO:0055114	oxidation-reduction process	84/360	261/1688	5.30486122335704e-06	0.0001993112145347	17085529/17085140/17089931/17090382/17086742/17085155/17085297/17085623/17085884/17091274/17085531/17088509/17085590/17091114/17090147/17085915/17088661/17086365/17090793/17085558/17088185/17086641/17090387/17088508/17085596/17089071/17088036/17087977/17090855/17088548/17086741/17085530/17091252/17088843/17086117/17091080/17085585/17085017/17087223/17087606/17085845/17090047/17085644/17087493/170…	Gasu_57960/Gasu_62010/Gasu_15110/Gasu_11340/Gasu_46810/Gasu_61820/Gasu_60470/Gasu_57790/Gasu_55090/Gasu_00840/Gasu_57980/Gasu_29530/Gasu_57480/Gasu_03180/Gasu_11830/Gasu_54250/Gasu_26840/Gasu_50490/Gasu_06100/Gasu_58250/Gasu_32100/Gasu_47430/Gasu_11390/Gasu_29520/Gasu_57540/Gasu_22460/Gasu_34200/Gasu_33620/Gasu_06720/Gasu_27800/Gasu_46800/Gasu_57970/Gasu_00620/Gasu_24710/Gasu_52870/Gasu_02840/Gas…	84	28	17089931/17085884/17088509/17085590/17090147/17085915/17086365/17090793/17088185/17090387/17088508/17085596/17089071/17088036/17087977/17091252/17088843/17091080/17087606/17087746/17088390/17089707/17088919/17084928/17087794/17085552/17085972/17087726	56	17085529/17085140/17090382/17086742/17085155/17085297/17085623/17091274/17085531/17091114/17088661/17085558/17086641/17090855/17088548/17086741/17085530/17086117/17085585/17085017/17087223/17085845/17090047/17085644/17087493/17087287/17087689/17090885/17087190/17087096/17090248/17087302/17089219/17089447/17088810/17090388/17087288/17085338/17088086/17087336/17087376/17084869/17087456/17085840/170…
BP	GO:1901566	organonitrogen compound biosynthetic process	82/360	268/1688	6.36713467237004e-05	0.00206669475084638	17086993/17089592/17088507/17089351/17087457/17089314/17085569/17089664/17091218/17089549/17088038/17088991/17085756/17085589/17090801/17086388/17089554/17086170/17089814/17089562/17090783/17089425/17090877/17090240/17090031/17086085/17090666/17086915/17087946/17089222/17089833/17087938/17085558/17087925/17087667/17086118/17088459/17089063/17089071/17086423/17088649/17085568/17087751/17087738/170…	Gasu_42990/Gasu_19110/Gasu_29510/Gasu_20930/Gasu_39740/Gasu_20560/Gasu_57270/Gasu_17370/Gasu_00280/Gasu_18680/Gasu_34220/Gasu_24010/Gasu_55950/Gasu_57470/Gasu_06180/Gasu_49340/Gasu_18730/Gasu_52210/Gasu_16370/Gasu_18810/Gasu_06000/Gasu_19580/Gasu_06940/Gasu_12760/Gasu_13470/Gasu_52570/Gasu_08090/Gasu_43860/Gasu_35130/Gasu_21700/Gasu_16560/Gasu_35050/Gasu_58250/Gasu_34920/Gasu_37110/Gasu_52880/Gas…	82	60	17086993/17089592/17088507/17089351/17087457/17089314/17085569/17089664/17091218/17089549/17088038/17088991/17085756/17085589/17090801/17086388/17089554/17089814/17089562/17090783/17089425/17090877/17090240/17090031/17086085/17090666/17086915/17087946/17089222/17089833/17087938/17087925/17087667/17086118/17088459/17089063/17089071/17086423/17088649/17085568/17087751/17087738/17086225/17085200/170…	22	17086170/17085558/17086128/17089869/17084965/17087322/17091312/17087456/17087325/17087344/17087320/17091217/17087324/17087292/17087326/17085836/17087307/17087323/17087348/17087319/17087318/17087349
BP	GO:0009059	macromolecule biosynthetic process	90/360	302/1688	7.85815494618395e-05	0.00206669475084638	17086993/17089592/17088507/17089351/17087457/17089314/17085569/17089664/17091218/17089549/17088038/17088991/17087444/17085756/17085589/17090801/17086388/17089554/17089814/17089562/17090783/17089425/17090877/17090240/17090031/17086085/17090666/17086915/17087946/17089222/17088660/17089833/17090338/17087938/17087667/17088459/17087984/17089063/17087822/17086423/17090625/17086529/17088649/17088843/170…	Gasu_42990/Gasu_19110/Gasu_29510/Gasu_20930/Gasu_39740/Gasu_20560/Gasu_57270/Gasu_17370/Gasu_00280/Gasu_18680/Gasu_34220/Gasu_24010/Gasu_39610/Gasu_55950/Gasu_57470/Gasu_06180/Gasu_49340/Gasu_18730/Gasu_16370/Gasu_18810/Gasu_06000/Gasu_19580/Gasu_06940/Gasu_12760/Gasu_13470/Gasu_52570/Gasu_08090/Gasu_43860/Gasu_35130/Gasu_21700/Gasu_26830/Gasu_16560/Gasu_10900/Gasu_35050/Gasu_37110/Gasu_29040/Gas…	90	68	17086993/17089592/17088507/17089351/17087457/17089314/17085569/17089664/17091218/17089549/17088038/17088991/17085756/17085589/17090801/17086388/17089554/17089814/17089562/17090783/17089425/17090877/17090240/17090031/17086085/17090666/17086915/17087946/17089222/17089833/17087938/17087667/17088459/17089063/17087822/17086423/17090625/17086529/17088649/17088843/17085568/17087751/17087738/17086225/170…	22	17087444/17088660/17090338/17087984/17088431/17087347/17087322/17087802/17087325/17087320/17087324/17087326/17089620/17087307/17087323/17087391/17087286/17087348/17087319/17087305/17087318/17087349
BP	GO:0034645	cellular macromolecule biosynthetic process	90/360	302/1688	7.85815494618395e-05	0.00206669475084638	17086993/17089592/17088507/17089351/17087457/17089314/17085569/17089664/17091218/17089549/17088038/17088991/17087444/17085756/17085589/17090801/17086388/17089554/17089814/17089562/17090783/17089425/17090877/17090240/17090031/17086085/17090666/17086915/17087946/17089222/17088660/17089833/17090338/17087938/17087667/17088459/17087984/17089063/17087822/17086423/17090625/17086529/17088649/17088843/170…	Gasu_42990/Gasu_19110/Gasu_29510/Gasu_20930/Gasu_39740/Gasu_20560/Gasu_57270/Gasu_17370/Gasu_00280/Gasu_18680/Gasu_34220/Gasu_24010/Gasu_39610/Gasu_55950/Gasu_57470/Gasu_06180/Gasu_49340/Gasu_18730/Gasu_16370/Gasu_18810/Gasu_06000/Gasu_19580/Gasu_06940/Gasu_12760/Gasu_13470/Gasu_52570/Gasu_08090/Gasu_43860/Gasu_35130/Gasu_21700/Gasu_26830/Gasu_16560/Gasu_10900/Gasu_35050/Gasu_37110/Gasu_29040/Gas…	90	68	17086993/17089592/17088507/17089351/17087457/17089314/17085569/17089664/17091218/17089549/17088038/17088991/17085756/17085589/17090801/17086388/17089554/17089814/17089562/17090783/17089425/17090877/17090240/17090031/17086085/17090666/17086915/17087946/17089222/17089833/17087938/17087667/17088459/17089063/17087822/17086423/17090625/17086529/17088649/17088843/17085568/17087751/17087738/17086225/170…	22	17087444/17088660/17090338/17087984/17088431/17087347/17087322/17087802/17087325/17087320/17087324/17087326/17089620/17087307/17087323/17087391/17087286/17087348/17087319/17087305/17087318/17087349
BP	GO:0044271	cellular nitrogen compound biosynthetic process	95/360	336/1688	0.000445753076441397	0.0106575508276443	17086993/17089592/17088507/17089351/17087457/17089314/17085569/17089664/17091218/17089549/17088038/17088991/17087444/17085756/17085589/17090801/17086388/17089554/17086170/17089814/17089562/17090783/17089425/17090146/17090877/17090240/17090031/17086085/17090666/17086915/17087946/17088660/17089833/17090338/17085558/17087667/17086118/17088459/17087984/17089063/17086423/17088649/17085568/17087751/170…	Gasu_42990/Gasu_19110/Gasu_29510/Gasu_20930/Gasu_39740/Gasu_20560/Gasu_57270/Gasu_17370/Gasu_00280/Gasu_18680/Gasu_34220/Gasu_24010/Gasu_39610/Gasu_55950/Gasu_57470/Gasu_06180/Gasu_49340/Gasu_18730/Gasu_52210/Gasu_16370/Gasu_18810/Gasu_06000/Gasu_19580/Gasu_11820/Gasu_06940/Gasu_12760/Gasu_13470/Gasu_52570/Gasu_08090/Gasu_43860/Gasu_35130/Gasu_26830/Gasu_16560/Gasu_10900/Gasu_58250/Gasu_37110/Gas…	95	61	17086993/17089592/17088507/17089351/17087457/17089314/17085569/17089664/17091218/17089549/17088038/17088991/17085756/17085589/17090801/17086388/17089554/17089814/17089562/17090783/17089425/17090877/17090240/17090031/17086085/17090666/17086915/17087946/17089833/17087667/17086118/17088459/17089063/17086423/17088649/17085568/17087751/17087738/17086225/17085200/17087881/17088379/17090745/17086149/170…	34	17087444/17086170/17090146/17088660/17090338/17085558/17087984/17086128/17088431/17089869/17087347/17084965/17087322/17091312/17090285/17087456/17087802/17087325/17087344/17087320/17091217/17087324/17087326/17089620/17085836/17087307/17087323/17087391/17087286/17087348/17087319/17087305/17087318/17087349
BP	GO:1901576	organic substance biosynthetic process	125/360	471/1688	0.000838518832175172	0.0183775377385059	17086993/17089592/17088507/17089351/17087457/17089314/17085569/17089664/17091218/17089549/17088038/17088991/17087444/17085756/17085589/17090801/17086388/17089554/17086170/17089814/17090390/17089562/17090783/17089425/17090146/17090877/17090240/17090031/17091101/17086085/17090666/17086915/17087946/17089222/17087433/17088660/17089833/17090338/17087938/17090101/17085558/17087925/17087667/17086118/170…	Gasu_42990/Gasu_19110/Gasu_29510/Gasu_20930/Gasu_39740/Gasu_20560/Gasu_57270/Gasu_17370/Gasu_00280/Gasu_18680/Gasu_34220/Gasu_24010/Gasu_39610/Gasu_55950/Gasu_57470/Gasu_06180/Gasu_49340/Gasu_18730/Gasu_52210/Gasu_16370/Gasu_11420/Gasu_18810/Gasu_06000/Gasu_19580/Gasu_11820/Gasu_06940/Gasu_12760/Gasu_13470/Gasu_03050/Gasu_52570/Gasu_08090/Gasu_43860/Gasu_35130/Gasu_21700/Gasu_39500/Gasu_26830/Gas…	125	79	17086993/17089592/17088507/17089351/17087457/17089314/17085569/17089664/17091218/17089549/17088038/17088991/17085756/17085589/17090801/17086388/17089554/17089814/17090390/17089562/17090783/17089425/17090877/17090240/17090031/17086085/17090666/17086915/17087946/17089222/17089833/17087938/17090101/17087925/17087667/17086118/17088459/17089063/17087822/17089071/17086423/17090625/17086529/17088649/170…	46	17087444/17086170/17090146/17091101/17087433/17088660/17090338/17085558/17087984/17088548/17089803/17086128/17088431/17089736/17089869/17087347/17084965/17085338/17087322/17091312/17090285/17087456/17087212/17087802/17087325/17087344/17087563/17087320/17087337/17091217/17087324/17087292/17087326/17086549/17089620/17085836/17087307/17087323/17087391/17087286/17087348/17087319/17087305/17087293/170…
BP	GO:0044249	cellular biosynthetic process	121/360	455/1688	0.000978071419295617	0.0197871371749806	17086993/17089592/17088507/17089351/17087457/17089314/17085569/17089664/17091218/17089549/17088038/17088991/17087444/17085756/17085589/17090801/17086388/17089554/17086170/17089814/17090390/17089562/17090783/17089425/17090146/17090877/17090240/17090031/17091101/17086085/17090666/17086915/17087946/17089222/17087433/17088660/17089833/17090338/17087938/17090101/17085558/17087925/17087667/17086118/170…	Gasu_42990/Gasu_19110/Gasu_29510/Gasu_20930/Gasu_39740/Gasu_20560/Gasu_57270/Gasu_17370/Gasu_00280/Gasu_18680/Gasu_34220/Gasu_24010/Gasu_39610/Gasu_55950/Gasu_57470/Gasu_06180/Gasu_49340/Gasu_18730/Gasu_52210/Gasu_16370/Gasu_11420/Gasu_18810/Gasu_06000/Gasu_19580/Gasu_11820/Gasu_06940/Gasu_12760/Gasu_13470/Gasu_03050/Gasu_52570/Gasu_08090/Gasu_43860/Gasu_35130/Gasu_21700/Gasu_39500/Gasu_26830/Gas…	121	79	17086993/17089592/17088507/17089351/17087457/17089314/17085569/17089664/17091218/17089549/17088038/17088991/17085756/17085589/17090801/17086388/17089554/17089814/17090390/17089562/17090783/17089425/17090877/17090240/17090031/17086085/17090666/17086915/17087946/17089222/17089833/17087938/17090101/17087925/17087667/17086118/17088459/17089063/17087822/17089071/17086423/17090625/17086529/17088649/170…	42	17087444/17086170/17090146/17091101/17087433/17088660/17090338/17085558/17087984/17088548/17086128/17088431/17089736/17089869/17087347/17084965/17087322/17091312/17090285/17087456/17087212/17087802/17087325/17087344/17087320/17087337/17091217/17087324/17087292/17087326/17089620/17085836/17087307/17087323/17087391/17087286/17087348/17087319/17087305/17087293/17087318/17087349
CC	GO:0005840	ribosome	55/196	93/802	1.95005709122128e-14	1.17003425473277e-12	17086993/17089592/17088507/17089351/17087457/17085569/17091218/17089549/17088038/17088991/17085756/17085589/17090801/17086388/17089554/17089814/17089562/17090783/17090877/17090240/17090031/17086085/17090666/17086915/17087946/17089833/17087667/17088459/17086423/17088649/17085568/17087751/17087738/17086225/17085200/17087881/17086149/17085958/17085943/17090558/17090610/17088794/17090619/17087322/170…	Gasu_42990/Gasu_19110/Gasu_29510/Gasu_20930/Gasu_39740/Gasu_57270/Gasu_00280/Gasu_18680/Gasu_34220/Gasu_24010/Gasu_55950/Gasu_57470/Gasu_06180/Gasu_49340/Gasu_18730/Gasu_16370/Gasu_18810/Gasu_06000/Gasu_06940/Gasu_12760/Gasu_13470/Gasu_52570/Gasu_08090/Gasu_43860/Gasu_35130/Gasu_16560/Gasu_37110/Gasu_29040/Gasu_49690/Gasu_26720/Gasu_57260/Gasu_36510/Gasu_36380/Gasu_51580/Gasu_61420/Gasu_34490/Gas…	55	45	17086993/17089592/17088507/17089351/17087457/17085569/17091218/17089549/17088038/17088991/17085756/17085589/17090801/17086388/17089554/17089814/17089562/17090783/17090877/17090240/17090031/17086085/17090666/17086915/17087946/17089833/17087667/17088459/17086423/17088649/17085568/17087751/17087738/17086225/17085200/17087881/17086149/17085958/17085943/17090558/17090610/17088794/17090619/17085202/170…	10	17087322/17087325/17087320/17087324/17087326/17087307/17087323/17087348/17087319/17087318
CC	GO:0009579	thylakoid	22/196	25/802	1.51753496501061e-11	2.27630244751592e-10	17087302/17087333/17089797/17087343/17087376/17088681/17087331/17087342/17087878/17087006/17087291/17087980/17087332/17087290/17088679/17084837/17087359/17087296/17087355/17087386/17087295/17087356	Gasu_40150/Gasu_40460/Gasu_16200/Gasu_40550/Gasu_40270/Gasu_27040/Gasu_40440/Gasu_40540/Gasu_34460/Gasu_43120/Gasu_40040/Gasu_33650/Gasu_40450/Gasu_40030/Gasu_27020/Gasu_64970/Gasu_40710/Gasu_40090/Gasu_40670/Gasu_40480/Gasu_40080/Gasu_40680	22	0		22	17087302/17087333/17089797/17087343/17087376/17088681/17087331/17087342/17087878/17087006/17087291/17087980/17087332/17087290/17088679/17084837/17087359/17087296/17087355/17087386/17087295/17087356
CC	GO:0034357	photosynthetic membrane	22/196	25/802	1.51753496501061e-11	2.27630244751592e-10	17087302/17087333/17089797/17087343/17087376/17088681/17087331/17087342/17087878/17087006/17087291/17087980/17087332/17087290/17088679/17084837/17087359/17087296/17087355/17087386/17087295/17087356	Gasu_40150/Gasu_40460/Gasu_16200/Gasu_40550/Gasu_40270/Gasu_27040/Gasu_40440/Gasu_40540/Gasu_34460/Gasu_43120/Gasu_40040/Gasu_33650/Gasu_40450/Gasu_40030/Gasu_27020/Gasu_64970/Gasu_40710/Gasu_40090/Gasu_40670/Gasu_40480/Gasu_40080/Gasu_40680	22	0		22	17087302/17087333/17089797/17087343/17087376/17088681/17087331/17087342/17087878/17087006/17087291/17087980/17087332/17087290/17088679/17084837/17087359/17087296/17087355/17087386/17087295/17087356
CC	GO:0044436	thylakoid part	22/196	25/802	1.51753496501061e-11	2.27630244751592e-10	17087302/17087333/17089797/17087343/17087376/17088681/17087331/17087342/17087878/17087006/17087291/17087980/17087332/17087290/17088679/17084837/17087359/17087296/17087355/17087386/17087295/17087356	Gasu_40150/Gasu_40460/Gasu_16200/Gasu_40550/Gasu_40270/Gasu_27040/Gasu_40440/Gasu_40540/Gasu_34460/Gasu_43120/Gasu_40040/Gasu_33650/Gasu_40450/Gasu_40030/Gasu_27020/Gasu_64970/Gasu_40710/Gasu_40090/Gasu_40670/Gasu_40480/Gasu_40080/Gasu_40680	22	0		22	17087302/17087333/17089797/17087343/17087376/17088681/17087331/17087342/17087878/17087006/17087291/17087980/17087332/17087290/17088679/17084837/17087359/17087296/17087355/17087386/17087295/17087356
CC	GO:0043228	non-membrane-bounded organelle	64/196	133/802	4.44865153718639e-11	4.44865153718639e-10	17086993/17089592/17088507/17089351/17087457/17085569/17091218/17089549/17088038/17088991/17085756/17085589/17090801/17086388/17089554/17089814/17089562/17090783/17090877/17090240/17090031/17086085/17090666/17086915/17087946/17089833/17085010/17087667/17088459/17087863/17086423/17085392/17088649/17085568/17087751/17087738/17086225/17085013/17085376/17087754/17085200/17087881/17085187/17086149/170…	Gasu_42990/Gasu_19110/Gasu_29510/Gasu_20930/Gasu_39740/Gasu_57270/Gasu_00280/Gasu_18680/Gasu_34220/Gasu_24010/Gasu_55950/Gasu_57470/Gasu_06180/Gasu_49340/Gasu_18730/Gasu_16370/Gasu_18810/Gasu_06000/Gasu_06940/Gasu_12760/Gasu_13470/Gasu_52570/Gasu_08090/Gasu_43860/Gasu_35130/Gasu_16560/Gasu_63250/Gasu_37110/Gasu_29040/Gasu_36030/Gasu_49690/Gasu_59660/Gasu_26720/Gasu_57260/Gasu_36510/Gasu_36380/Gas…	64	53	17086993/17089592/17088507/17089351/17087457/17085569/17091218/17089549/17088038/17088991/17085756/17085589/17090801/17086388/17089554/17089814/17089562/17090783/17090877/17090240/17090031/17086085/17090666/17086915/17087946/17089833/17085010/17087667/17088459/17087863/17086423/17085392/17088649/17085568/17087751/17087738/17086225/17085013/17085376/17085200/17087881/17085187/17086149/17085958/170…	11	17087754/17087322/17087325/17087320/17087324/17087326/17087307/17087323/17087348/17087319/17087318
CC	GO:0043232	intracellular non-membrane-bounded organelle	64/196	133/802	4.44865153718639e-11	4.44865153718639e-10	17086993/17089592/17088507/17089351/17087457/17085569/17091218/17089549/17088038/17088991/17085756/17085589/17090801/17086388/17089554/17089814/17089562/17090783/17090877/17090240/17090031/17086085/17090666/17086915/17087946/17089833/17085010/17087667/17088459/17087863/17086423/17085392/17088649/17085568/17087751/17087738/17086225/17085013/17085376/17087754/17085200/17087881/17085187/17086149/170…	Gasu_42990/Gasu_19110/Gasu_29510/Gasu_20930/Gasu_39740/Gasu_57270/Gasu_00280/Gasu_18680/Gasu_34220/Gasu_24010/Gasu_55950/Gasu_57470/Gasu_06180/Gasu_49340/Gasu_18730/Gasu_16370/Gasu_18810/Gasu_06000/Gasu_06940/Gasu_12760/Gasu_13470/Gasu_52570/Gasu_08090/Gasu_43860/Gasu_35130/Gasu_16560/Gasu_63250/Gasu_37110/Gasu_29040/Gasu_36030/Gasu_49690/Gasu_59660/Gasu_26720/Gasu_57260/Gasu_36510/Gasu_36380/Gas…	64	53	17086993/17089592/17088507/17089351/17087457/17085569/17091218/17089549/17088038/17088991/17085756/17085589/17090801/17086388/17089554/17089814/17089562/17090783/17090877/17090240/17090031/17086085/17090666/17086915/17087946/17089833/17085010/17087667/17088459/17087863/17086423/17085392/17088649/17085568/17087751/17087738/17086225/17085013/17085376/17085200/17087881/17085187/17086149/17085958/170…	11	17087754/17087322/17087325/17087320/17087324/17087326/17087307/17087323/17087348/17087319/17087318
CC	GO:1990904	ribonucleoprotein complex	55/196	113/802	1.04747345709291e-09	8.97834391793925e-09	17086993/17089592/17088507/17089351/17087457/17085569/17091218/17089549/17088038/17088991/17085756/17085589/17090801/17086388/17089554/17089814/17089562/17090783/17090877/17090240/17090031/17086085/17090666/17086915/17087946/17089833/17087667/17088459/17086423/17088649/17085568/17087751/17087738/17086225/17085200/17087881/17086149/17085958/17085943/17090558/17090610/17088794/17090619/17087322/170…	Gasu_42990/Gasu_19110/Gasu_29510/Gasu_20930/Gasu_39740/Gasu_57270/Gasu_00280/Gasu_18680/Gasu_34220/Gasu_24010/Gasu_55950/Gasu_57470/Gasu_06180/Gasu_49340/Gasu_18730/Gasu_16370/Gasu_18810/Gasu_06000/Gasu_06940/Gasu_12760/Gasu_13470/Gasu_52570/Gasu_08090/Gasu_43860/Gasu_35130/Gasu_16560/Gasu_37110/Gasu_29040/Gasu_49690/Gasu_26720/Gasu_57260/Gasu_36510/Gasu_36380/Gasu_51580/Gasu_61420/Gasu_34490/Gas…	55	45	17086993/17089592/17088507/17089351/17087457/17085569/17091218/17089549/17088038/17088991/17085756/17085589/17090801/17086388/17089554/17089814/17089562/17090783/17090877/17090240/17090031/17086085/17090666/17086915/17087946/17089833/17087667/17088459/17086423/17088649/17085568/17087751/17087738/17086225/17085200/17087881/17086149/17085958/17085943/17090558/17090610/17088794/17090619/17085202/170…	10	17087322/17087325/17087320/17087324/17087326/17087307/17087323/17087348/17087319/17087318
CC	GO:0042651	thylakoid membrane	13/196	15/802	5.26551156558132e-07	3.94913367418599e-06	17089797/17087343/17088681/17087342/17087878/17087006/17087291/17087980/17087290/17088679/17087359/17087296/17087295	Gasu_16200/Gasu_40550/Gasu_27040/Gasu_40540/Gasu_34460/Gasu_43120/Gasu_40040/Gasu_33650/Gasu_40030/Gasu_27020/Gasu_40710/Gasu_40090/Gasu_40080	13	0		13	17089797/17087343/17088681/17087342/17087878/17087006/17087291/17087980/17087290/17088679/17087359/17087296/17087295
CC	GO:0009521	photosystem	12/196	14/802	1.96131179714282e-06	1.30754119809521e-05	17087302/17087333/17087376/17088681/17087331/17087006/17087332/17088679/17084837/17087355/17087386/17087356	Gasu_40150/Gasu_40460/Gasu_40270/Gasu_27040/Gasu_40440/Gasu_43120/Gasu_40450/Gasu_27020/Gasu_64970/Gasu_40670/Gasu_40480/Gasu_40680	12	0		12	17087302/17087333/17087376/17088681/17087331/17087006/17087332/17088679/17084837/17087355/17087386/17087356
CC	GO:0044444	cytoplasmic part	67/196	180/802	8.38021299787932e-06	5.02812779872759e-05	17086993/17089592/17088507/17089351/17087457/17085569/17091218/17089549/17088038/17088991/17085756/17085589/17090801/17086388/17089554/17089814/17089562/17090783/17088864/17090877/17089545/17090240/17089047/17090031/17086085/17090666/17087899/17086915/17087946/17089222/17089833/17090147/17087938/17087667/17088459/17086423/17088649/17085568/17087751/17087738/17089803/17086225/17085200/17087881/170…	Gasu_42990/Gasu_19110/Gasu_29510/Gasu_20930/Gasu_39740/Gasu_57270/Gasu_00280/Gasu_18680/Gasu_34220/Gasu_24010/Gasu_55950/Gasu_57470/Gasu_06180/Gasu_49340/Gasu_18730/Gasu_16370/Gasu_18810/Gasu_06000/Gasu_24930/Gasu_06940/Gasu_18640/Gasu_12760/Gasu_24570/Gasu_13470/Gasu_52570/Gasu_08090/Gasu_34670/Gasu_43860/Gasu_35130/Gasu_21700/Gasu_16560/Gasu_11830/Gasu_35050/Gasu_37110/Gasu_29040/Gasu_49690/Gas…	67	52	17086993/17089592/17088507/17089351/17087457/17085569/17091218/17089549/17088038/17088991/17085756/17085589/17090801/17086388/17089554/17089814/17089562/17090783/17088864/17090877/17089545/17090240/17089047/17090031/17086085/17090666/17087899/17086915/17087946/17089222/17089833/17090147/17087938/17087667/17088459/17086423/17088649/17085568/17087751/17087738/17086225/17085200/17087881/17086149/170…	15	17089803/17090527/17089219/17087322/17090556/17087325/17087320/17087324/17087326/17087307/17087323/17087348/17087319/17087293/17087318
CC	GO:0032991	protein-containing complex	94/196	280/802	9.93019277504351e-06	5.41646878638737e-05	17086993/17089592/17088507/17089351/17087457/17085569/17091218/17089549/17088038/17088991/17085756/17085589/17090801/17086388/17089554/17089814/17089562/17090783/17090877/17090240/17090031/17086085/17090666/17086915/17087946/17088660/17089833/17087938/17085010/17087667/17088459/17086423/17085392/17088649/17085568/17088356/17087751/17087738/17086225/17085013/17085376/17087754/17085200/17087881/170…	Gasu_42990/Gasu_19110/Gasu_29510/Gasu_20930/Gasu_39740/Gasu_57270/Gasu_00280/Gasu_18680/Gasu_34220/Gasu_24010/Gasu_55950/Gasu_57470/Gasu_06180/Gasu_49340/Gasu_18730/Gasu_16370/Gasu_18810/Gasu_06000/Gasu_06940/Gasu_12760/Gasu_13470/Gasu_52570/Gasu_08090/Gasu_43860/Gasu_35130/Gasu_26830/Gasu_16560/Gasu_35050/Gasu_63250/Gasu_37110/Gasu_29040/Gasu_49690/Gasu_59660/Gasu_26720/Gasu_57260/Gasu_30120/Gas…	94	56	17086993/17089592/17088507/17089351/17087457/17085569/17091218/17089549/17088038/17088991/17085756/17085589/17090801/17086388/17089554/17089814/17089562/17090783/17090877/17090240/17090031/17086085/17090666/17086915/17087946/17089833/17087938/17085010/17087667/17088459/17086423/17085392/17088649/17085568/17087751/17087738/17086225/17085013/17085376/17085200/17087881/17085187/17086149/17085958/170…	38	17088660/17088356/17087754/17087302/17089869/17087333/17089797/17087322/17087343/17087376/17088681/17087331/17087342/17087006/17087291/17087980/17087325/17085684/17087320/17087332/17087290/17088679/17084837/17087324/17087326/17087359/17087296/17087355/17087307/17087386/17087323/17087348/17087295/17087356/17087319/17087293/17087318/17087349
CC	GO:0005737	cytoplasm	68/196	211/802	0.00172138743658634	0.00860693718293169	17086993/17089592/17088507/17089351/17087457/17085569/17091218/17089549/17088038/17088991/17085756/17085589/17090801/17086388/17089554/17089814/17089562/17090783/17088864/17090877/17089545/17090240/17089047/17090031/17086085/17090666/17087899/17086915/17087946/17089222/17089833/17090147/17087938/17087667/17088459/17086423/17088649/17085568/17087751/17087738/17089803/17086225/17085200/17087881/170…	Gasu_42990/Gasu_19110/Gasu_29510/Gasu_20930/Gasu_39740/Gasu_57270/Gasu_00280/Gasu_18680/Gasu_34220/Gasu_24010/Gasu_55950/Gasu_57470/Gasu_06180/Gasu_49340/Gasu_18730/Gasu_16370/Gasu_18810/Gasu_06000/Gasu_24930/Gasu_06940/Gasu_18640/Gasu_12760/Gasu_24570/Gasu_13470/Gasu_52570/Gasu_08090/Gasu_34670/Gasu_43860/Gasu_35130/Gasu_21700/Gasu_16560/Gasu_11830/Gasu_35050/Gasu_37110/Gasu_29040/Gasu_49690/Gas…	68	53	17086993/17089592/17088507/17089351/17087457/17085569/17091218/17089549/17088038/17088991/17085756/17085589/17090801/17086388/17089554/17089814/17089562/17090783/17088864/17090877/17089545/17090240/17089047/17090031/17086085/17090666/17087899/17086915/17087946/17089222/17089833/17090147/17087938/17087667/17088459/17086423/17088649/17085568/17087751/17087738/17086225/17085200/17087881/17086149/170…	15	17089803/17090527/17089219/17087322/17090556/17087325/17087320/17087324/17087326/17087307/17087323/17087348/17087319/17087293/17087318
CC	GO:0044815	DNA packaging complex	7/196	10/802	0.00286633128597989	0.0132292213199072	17085010/17085392/17085013/17087754/17085187/17089270/17085112	Gasu_63250/Gasu_59660/Gasu_63240/Gasu_36540/Gasu_61570/Gasu_22180/Gasu_62230	7	6	17085010/17085392/17085013/17085187/17089270/17085112	1	17087754
CC	GO:0098796	membrane protein complex	24/196	60/802	0.0040427639723514	0.0173261313100774	17087938/17087302/17089869/17087333/17089797/17087343/17087376/17088681/17087331/17087342/17087006/17087291/17087980/17087332/17087290/17088679/17084837/17087359/17087296/17087355/17087386/17087295/17087356/17087349	Gasu_35050/Gasu_40150/Gasu_14490/Gasu_40460/Gasu_16200/Gasu_40550/Gasu_40270/Gasu_27040/Gasu_40440/Gasu_40540/Gasu_43120/Gasu_40040/Gasu_33650/Gasu_40450/Gasu_40030/Gasu_27020/Gasu_64970/Gasu_40710/Gasu_40090/Gasu_40670/Gasu_40480/Gasu_40080/Gasu_40680/Gasu_40610	24	1	17087938	23	17087302/17089869/17087333/17089797/17087343/17087376/17088681/17087331/17087342/17087006/17087291/17087980/17087332/17087290/17088679/17084837/17087359/17087296/17087355/17087386/17087295/17087356/17087349
MF	GO:0003735	structural constituent of ribosome	55/468	94/2551	8.18644644454955e-19	1.14610250223694e-16	17086993/17089592/17088507/17089351/17087457/17085569/17091218/17089549/17088038/17088991/17085756/17085589/17090801/17086388/17089554/17089814/17089562/17090783/17090877/17090240/17090031/17086085/17090666/17086915/17087946/17089833/17087667/17088459/17086423/17088649/17085568/17087751/17087738/17086225/17085200/17087881/17086149/17085958/17085943/17090558/17090610/17088794/17090619/17087322/170…	Gasu_42990/Gasu_19110/Gasu_29510/Gasu_20930/Gasu_39740/Gasu_57270/Gasu_00280/Gasu_18680/Gasu_34220/Gasu_24010/Gasu_55950/Gasu_57470/Gasu_06180/Gasu_49340/Gasu_18730/Gasu_16370/Gasu_18810/Gasu_06000/Gasu_06940/Gasu_12760/Gasu_13470/Gasu_52570/Gasu_08090/Gasu_43860/Gasu_35130/Gasu_16560/Gasu_37110/Gasu_29040/Gasu_49690/Gasu_26720/Gasu_57260/Gasu_36510/Gasu_36380/Gasu_51580/Gasu_61420/Gasu_34490/Gas…	55	45	17086993/17089592/17088507/17089351/17087457/17085569/17091218/17089549/17088038/17088991/17085756/17085589/17090801/17086388/17089554/17089814/17089562/17090783/17090877/17090240/17090031/17086085/17090666/17086915/17087946/17089833/17087667/17088459/17086423/17088649/17085568/17087751/17087738/17086225/17085200/17087881/17086149/17085958/17085943/17090558/17090610/17088794/17090619/17085202/170…	10	17087322/17087325/17087320/17087324/17087326/17087307/17087323/17087348/17087319/17087318
MF	GO:0005198	structural molecule activity	55/468	104/2551	4.29478388338743e-16	3.0063487183712e-14	17086993/17089592/17088507/17089351/17087457/17085569/17091218/17089549/17088038/17088991/17085756/17085589/17090801/17086388/17089554/17089814/17089562/17090783/17090877/17090240/17090031/17086085/17090666/17086915/17087946/17089833/17087667/17088459/17086423/17088649/17085568/17087751/17087738/17086225/17085200/17087881/17086149/17085958/17085943/17090558/17090610/17088794/17090619/17087322/170…	Gasu_42990/Gasu_19110/Gasu_29510/Gasu_20930/Gasu_39740/Gasu_57270/Gasu_00280/Gasu_18680/Gasu_34220/Gasu_24010/Gasu_55950/Gasu_57470/Gasu_06180/Gasu_49340/Gasu_18730/Gasu_16370/Gasu_18810/Gasu_06000/Gasu_06940/Gasu_12760/Gasu_13470/Gasu_52570/Gasu_08090/Gasu_43860/Gasu_35130/Gasu_16560/Gasu_37110/Gasu_29040/Gasu_49690/Gasu_26720/Gasu_57260/Gasu_36510/Gasu_36380/Gasu_51580/Gasu_61420/Gasu_34490/Gas…	55	45	17086993/17089592/17088507/17089351/17087457/17085569/17091218/17089549/17088038/17088991/17085756/17085589/17090801/17086388/17089554/17089814/17089562/17090783/17090877/17090240/17090031/17086085/17090666/17086915/17087946/17089833/17087667/17088459/17086423/17088649/17085568/17087751/17087738/17086225/17085200/17087881/17086149/17085958/17085943/17090558/17090610/17088794/17090619/17085202/170…	10	17087322/17087325/17087320/17087324/17087326/17087307/17087323/17087348/17087319/17087318
MF	GO:0016491	oxidoreductase activity	86/468	277/2551	3.72100427066812e-08	1.73646865964512e-06	17085529/17085140/17089931/17090382/17088864/17085494/17086742/17085155/17085297/17085623/17091242/17085884/17091274/17085531/17088509/17085590/17091114/17090147/17085915/17088661/17086365/17090793/17085558/17086641/17090387/17088508/17089071/17088036/17087977/17090855/17088548/17086741/17088843/17086117/17091080/17085017/17090047/17085644/17087493/17087287/17087689/17087746/17090885/17087190/170…	Gasu_57960/Gasu_62010/Gasu_15110/Gasu_11340/Gasu_24930/Gasu_58490/Gasu_46810/Gasu_61820/Gasu_60470/Gasu_57790/Gasu_00520/Gasu_55090/Gasu_00840/Gasu_57980/Gasu_29530/Gasu_57480/Gasu_03180/Gasu_11830/Gasu_54250/Gasu_26840/Gasu_50490/Gasu_06100/Gasu_58250/Gasu_47430/Gasu_11390/Gasu_29520/Gasu_22460/Gasu_34200/Gasu_33620/Gasu_06720/Gasu_27800/Gasu_46800/Gasu_24710/Gasu_52870/Gasu_02840/Gasu_63180/Gas…	86	27	17089931/17088864/17091242/17085884/17088509/17085590/17090147/17085915/17086365/17090793/17090387/17088508/17089071/17088036/17087977/17088843/17091080/17087746/17088390/17089707/17088919/17084928/17087794/17085552/17090611/17085972/17087726	59	17085529/17085140/17090382/17085494/17086742/17085155/17085297/17085623/17091274/17085531/17091114/17088661/17085558/17086641/17090855/17088548/17086741/17086117/17085017/17090047/17085644/17087493/17087287/17087689/17090885/17087190/17087360/17090248/17087302/17089219/17089736/17087008/17089447/17087288/17085338/17088086/17087336/17088681/17084869/17086258/17087456/17085840/17090489/17086212/170…
MF	GO:0022857	transmembrane transporter activity	45/468	155/2551	0.000536196932637678	0.0173368397776881	17091097/17091193/17088864/17088706/17090840/17085430/17086415/17088291/17089011/17088062/17086118/17086033/17088588/17090016/17089751/17087804/17087147/17084812/17084916/17084743/17088653/17088108/17089869/17087146/17090511/17088096/17088873/17089173/17087560/17089031/17085028/17085337/17086030/17091131/17086402/17087113/17085516/17088636/17087145/17085246/17084799/17085525/17084753/17089111/170…	Gasu_03010/Gasu_00030/Gasu_24930/Gasu_27280/Gasu_06570/Gasu_59430/Gasu_49610/Gasu_31400/Gasu_24210/Gasu_32620/Gasu_52880/Gasu_53210/Gasu_28190/Gasu_13330/Gasu_15740/Gasu_35440/Gasu_41450/Gasu_65210/Gasu_64190/Gasu_65900/Gasu_26760/Gasu_33080/Gasu_14490/Gasu_41440/Gasu_09670/Gasu_32580/Gasu_25020/Gasu_23470/Gasu_37640/Gasu_24410/Gasu_63100/Gasu_60060/Gasu_53180/Gasu_03350/Gasu_49480/Gasu_42600/Gas…	45	9	17088864/17086118/17088588/17089751/17084812/17084743/17088653/17088873/17088636	36	17091097/17091193/17088706/17090840/17085430/17086415/17088291/17089011/17088062/17086033/17090016/17087804/17087147/17084916/17088108/17089869/17087146/17090511/17088096/17089173/17087560/17089031/17085028/17085337/17086030/17091131/17086402/17087113/17085516/17087145/17085246/17084799/17085525/17084753/17089111/17087349
MF	GO:0048037	cofactor binding	50/468	178/2551	0.000619172849203148	0.0173368397776881	17089931/17090382/17086742/17085297/17085915/17088661/17086365/17090387/17089071/17085806/17088036/17090855/17090659/17089445/17091080/17085585/17086808/17087620/17085644/17087493/17088363/17087360/17087302/17089707/17089219/17084928/17087794/17085723/17087008/17085552/17090947/17086046/17087376/17084869/17086258/17087456/17090497/17086212/17087878/17087434/17088710/17085050/17088238/17087659/170…	Gasu_15110/Gasu_11340/Gasu_46810/Gasu_60470/Gasu_54250/Gasu_26840/Gasu_50490/Gasu_11390/Gasu_22460/Gasu_55420/Gasu_34200/Gasu_06720/Gasu_08020/Gasu_19770/Gasu_02840/Gasu_57430/Gasu_45900/Gasu_38180/Gasu_56920/Gasu_38460/Gasu_30180/Gasu_40720/Gasu_40150/Gasu_17800/Gasu_21670/Gasu_64070/Gasu_35340/Gasu_56640/Gasu_43140/Gasu_58190/Gasu_04500/Gasu_53340/Gasu_40270/Gasu_64640/Gasu_50720/Gasu_39730/Gas…	50	18	17089931/17085915/17086365/17090387/17089071/17088036/17089445/17091080/17087620/17089707/17084928/17087794/17085723/17085552/17086046/17090497/17085448/17091118	32	17090382/17086742/17085297/17088661/17085806/17090855/17090659/17085585/17086808/17085644/17087493/17088363/17087360/17087302/17089219/17087008/17090947/17087376/17084869/17086258/17087456/17086212/17087878/17087434/17088710/17085050/17088238/17087659/17085893/17085248/17087372/17087315

## Sheet: GLUvsPHOT_All-GO
Category	GOID	Description	GeneRatio	BgRatio	pvalue	padj	geneID	geneName	Count	Up	Up_Gene_id	Down	Down_Gene_id
BP	GO:0015979	photosynthesis	26/385	27/1688	2.23582557401952e-16	6.01437079411252e-14	17087980/17088681/17087006/17089797/17088679/17084837/17087815/17085313/17087331/17091199/17087333/17087376/17087302/17087343/17087291/17087342/17087297/17087332/17087290/17087359/17087295/17087296/17087355/17087386/17087356/17087383	Gasu_33650/Gasu_27040/Gasu_43120/Gasu_16200/Gasu_27020/Gasu_64970/Gasu_35550/Gasu_60110/Gasu_40440/Gasu_00090/Gasu_40460/Gasu_40270/Gasu_40150/Gasu_40550/Gasu_40040/Gasu_40540/Gasu_40100/Gasu_40450/Gasu_40030/Gasu_40710/Gasu_40080/Gasu_40090/Gasu_40670/Gasu_40480/Gasu_40680/Gasu_40700	26	0		26	17087980/17088681/17087006/17089797/17088679/17084837/17087815/17085313/17087331/17091199/17087333/17087376/17087302/17087343/17087291/17087342/17087297/17087332/17087290/17087359/17087295/17087296/17087355/17087386/17087356/17087383
BP	GO:0055114	oxidation-reduction process	93/385	261/1688	1.86217682012856e-07	2.50462782307292e-05	17085140/17085530/17086365/17089707/17085529/17090388/17085155/17088843/17086641/17085248/17091114/17088661/17085644/17087878/17089447/17086305/17085531/17090047/17086774/17088086/17085623/17088810/17087606/17090382/17087456/17085552/17088185/17088036/17089931/17085915/17085558/17091274/17085297/17086558/17087493/17088548/17085972/17088509/17090855/17088508/17087096/17091252/17087190/17086776/170…	Gasu_62010/Gasu_57970/Gasu_50490/Gasu_17800/Gasu_57960/Gasu_11400/Gasu_61820/Gasu_24710/Gasu_47430/Gasu_60980/Gasu_03180/Gasu_26840/Gasu_56920/Gasu_34460/Gasu_19790/Gasu_49900/Gasu_57980/Gasu_13630/Gasu_45570/Gasu_32870/Gasu_57790/Gasu_26370/Gasu_38040/Gasu_11340/Gasu_39730/Gasu_58190/Gasu_32100/Gasu_34200/Gasu_15110/Gasu_54250/Gasu_58250/Gasu_00840/Gasu_60470/Gasu_48130/Gasu_38460/Gasu_27800/Gas…	93	26	17086365/17089707/17088843/17087606/17085552/17088185/17088036/17089931/17085915/17085972/17088509/17088508/17091252/17089268/17088051/17090387/17087794/17085884/17088390/17090793/17084928/17085590/17085596/17090147/17089071/17087977	67	17085140/17085530/17085529/17090388/17085155/17086641/17085248/17091114/17088661/17085644/17087878/17089447/17086305/17085531/17090047/17086774/17088086/17085623/17088810/17090382/17087456/17085558/17091274/17085297/17086558/17087493/17088548/17090855/17087096/17087190/17086776/17086742/17087659/17085585/17087223/17085050/17085017/17086442/17090885/17090248/17086741/17085845/17087689/17088705/170…
BP	GO:0006412	translation	56/385	148/1688	1.09929097662327e-05	0.000985697575705535	17089592/17090240/17091218/17085569/17088038/17090801/17089549/17088794/17089562/17089554/17086993/17085756/17085943/17088507/17090666/17088459/17086149/17087881/17087946/17088991/17089314/17086225/17087738/17089351/17089664/17085200/17087457/17090877/17085589/17090031/17086388/17090783/17089814/17086915/17089425/17086085/17089063/17090558/17085958/17089654/17089833/17086423/17085202/17088174/170…	Gasu_19110/Gasu_12760/Gasu_00280/Gasu_57270/Gasu_34220/Gasu_06180/Gasu_18680/Gasu_26210/Gasu_18810/Gasu_18730/Gasu_42990/Gasu_55950/Gasu_54520/Gasu_29510/Gasu_08090/Gasu_29040/Gasu_52020/Gasu_34490/Gasu_35130/Gasu_24010/Gasu_20560/Gasu_51580/Gasu_36380/Gasu_20930/Gasu_17370/Gasu_61420/Gasu_39740/Gasu_06940/Gasu_57470/Gasu_13470/Gasu_49340/Gasu_06000/Gasu_16370/Gasu_43860/Gasu_19580/Gasu_52570/Gas…	56	44	17089592/17090240/17091218/17085569/17088038/17090801/17089549/17088794/17089562/17089554/17086993/17085756/17085943/17088507/17090666/17088459/17086149/17087881/17087946/17088991/17089314/17086225/17087738/17089351/17089664/17085200/17087457/17090877/17085589/17090031/17086388/17090783/17089814/17086915/17089425/17086085/17089063/17090558/17085958/17089833/17086423/17085202/17088174/17090610	12	17089654/17087322/17087326/17087320/17087325/17087324/17087323/17085071/17087307/17087319/17087348/17087318
BP	GO:0043043	peptide biosynthetic process	56/385	151/1688	2.22796264770382e-05	0.00149830488058082	17089592/17090240/17091218/17085569/17088038/17090801/17089549/17088794/17089562/17089554/17086993/17085756/17085943/17088507/17090666/17088459/17086149/17087881/17087946/17088991/17089314/17086225/17087738/17089351/17089664/17085200/17087457/17090877/17085589/17090031/17086388/17090783/17089814/17086915/17089425/17086085/17089063/17090558/17085958/17089654/17089833/17086423/17085202/17088174/170…	Gasu_19110/Gasu_12760/Gasu_00280/Gasu_57270/Gasu_34220/Gasu_06180/Gasu_18680/Gasu_26210/Gasu_18810/Gasu_18730/Gasu_42990/Gasu_55950/Gasu_54520/Gasu_29510/Gasu_08090/Gasu_29040/Gasu_52020/Gasu_34490/Gasu_35130/Gasu_24010/Gasu_20560/Gasu_51580/Gasu_36380/Gasu_20930/Gasu_17370/Gasu_61420/Gasu_39740/Gasu_06940/Gasu_57470/Gasu_13470/Gasu_49340/Gasu_06000/Gasu_16370/Gasu_43860/Gasu_19580/Gasu_52570/Gas…	56	44	17089592/17090240/17091218/17085569/17088038/17090801/17089549/17088794/17089562/17089554/17086993/17085756/17085943/17088507/17090666/17088459/17086149/17087881/17087946/17088991/17089314/17086225/17087738/17089351/17089664/17085200/17087457/17090877/17085589/17090031/17086388/17090783/17089814/17086915/17089425/17086085/17089063/17090558/17085958/17089833/17086423/17085202/17088174/17090610	12	17089654/17087322/17087326/17087320/17087325/17087324/17087323/17085071/17087307/17087319/17087348/17087318
BP	GO:0006518	peptide metabolic process	56/385	154/1688	4.35705287565661e-05	0.00234409444710326	17089592/17090240/17091218/17085569/17088038/17090801/17089549/17088794/17089562/17089554/17086993/17085756/17085943/17088507/17090666/17088459/17086149/17087881/17087946/17088991/17089314/17086225/17087738/17089351/17089664/17085200/17087457/17090877/17085589/17090031/17086388/17090783/17089814/17086915/17089425/17086085/17089063/17090558/17085958/17089654/17089833/17086423/17085202/17088174/170…	Gasu_19110/Gasu_12760/Gasu_00280/Gasu_57270/Gasu_34220/Gasu_06180/Gasu_18680/Gasu_26210/Gasu_18810/Gasu_18730/Gasu_42990/Gasu_55950/Gasu_54520/Gasu_29510/Gasu_08090/Gasu_29040/Gasu_52020/Gasu_34490/Gasu_35130/Gasu_24010/Gasu_20560/Gasu_51580/Gasu_36380/Gasu_20930/Gasu_17370/Gasu_61420/Gasu_39740/Gasu_06940/Gasu_57470/Gasu_13470/Gasu_49340/Gasu_06000/Gasu_16370/Gasu_43860/Gasu_19580/Gasu_52570/Gas…	56	44	17089592/17090240/17091218/17085569/17088038/17090801/17089549/17088794/17089562/17089554/17086993/17085756/17085943/17088507/17090666/17088459/17086149/17087881/17087946/17088991/17089314/17086225/17087738/17089351/17089664/17085200/17087457/17090877/17085589/17090031/17086388/17090783/17089814/17086915/17089425/17086085/17089063/17090558/17085958/17089833/17086423/17085202/17088174/17090610	12	17089654/17087322/17087326/17087320/17087325/17087324/17087323/17085071/17087307/17087319/17087348/17087318
BP	GO:0043604	amide biosynthetic process	56/385	157/1688	8.23617118548124e-05	0.00369255008149076	17089592/17090240/17091218/17085569/17088038/17090801/17089549/17088794/17089562/17089554/17086993/17085756/17085943/17088507/17090666/17088459/17086149/17087881/17087946/17088991/17089314/17086225/17087738/17089351/17089664/17085200/17087457/17090877/17085589/17090031/17086388/17090783/17089814/17086915/17089425/17086085/17089063/17090558/17085958/17089654/17089833/17086423/17085202/17088174/170…	Gasu_19110/Gasu_12760/Gasu_00280/Gasu_57270/Gasu_34220/Gasu_06180/Gasu_18680/Gasu_26210/Gasu_18810/Gasu_18730/Gasu_42990/Gasu_55950/Gasu_54520/Gasu_29510/Gasu_08090/Gasu_29040/Gasu_52020/Gasu_34490/Gasu_35130/Gasu_24010/Gasu_20560/Gasu_51580/Gasu_36380/Gasu_20930/Gasu_17370/Gasu_61420/Gasu_39740/Gasu_06940/Gasu_57470/Gasu_13470/Gasu_49340/Gasu_06000/Gasu_16370/Gasu_43860/Gasu_19580/Gasu_52570/Gas…	56	44	17089592/17090240/17091218/17085569/17088038/17090801/17089549/17088794/17089562/17089554/17086993/17085756/17085943/17088507/17090666/17088459/17086149/17087881/17087946/17088991/17089314/17086225/17087738/17089351/17089664/17085200/17087457/17090877/17085589/17090031/17086388/17090783/17089814/17086915/17089425/17086085/17089063/17090558/17085958/17089833/17086423/17085202/17088174/17090610	12	17089654/17087322/17087326/17087320/17087325/17087324/17087323/17085071/17087307/17087319/17087348/17087318
BP	GO:0043603	cellular amide metabolic process	56/385	162/1688	0.000221676898327039	0.00851872652142477	17089592/17090240/17091218/17085569/17088038/17090801/17089549/17088794/17089562/17089554/17086993/17085756/17085943/17088507/17090666/17088459/17086149/17087881/17087946/17088991/17089314/17086225/17087738/17089351/17089664/17085200/17087457/17090877/17085589/17090031/17086388/17090783/17089814/17086915/17089425/17086085/17089063/17090558/17085958/17089654/17089833/17086423/17085202/17088174/170…	Gasu_19110/Gasu_12760/Gasu_00280/Gasu_57270/Gasu_34220/Gasu_06180/Gasu_18680/Gasu_26210/Gasu_18810/Gasu_18730/Gasu_42990/Gasu_55950/Gasu_54520/Gasu_29510/Gasu_08090/Gasu_29040/Gasu_52020/Gasu_34490/Gasu_35130/Gasu_24010/Gasu_20560/Gasu_51580/Gasu_36380/Gasu_20930/Gasu_17370/Gasu_61420/Gasu_39740/Gasu_06940/Gasu_57470/Gasu_13470/Gasu_49340/Gasu_06000/Gasu_16370/Gasu_43860/Gasu_19580/Gasu_52570/Gas…	56	44	17089592/17090240/17091218/17085569/17088038/17090801/17089549/17088794/17089562/17089554/17086993/17085756/17085943/17088507/17090666/17088459/17086149/17087881/17087946/17088991/17089314/17086225/17087738/17089351/17089664/17085200/17087457/17090877/17085589/17090031/17086388/17090783/17089814/17086915/17089425/17086085/17089063/17090558/17085958/17089833/17086423/17085202/17088174/17090610	12	17089654/17087322/17087326/17087320/17087325/17087324/17087323/17085071/17087307/17087319/17087348/17087318
BP	GO:1901566	organonitrogen compound biosynthetic process	81/385	268/1688	0.0013291508832524	0.0446926984493619	17087038/17086128/17084965/17089592/17087925/17091312/17090240/17091218/17091217/17085569/17088038/17090801/17089549/17088794/17089562/17089554/17086993/17085756/17085943/17088507/17090666/17088459/17086149/17087881/17087456/17087946/17088991/17089314/17086225/17087738/17089351/17089664/17086655/17085200/17087457/17090877/17085589/17090031/17086388/17087580/17085558/17090783/17089814/17086915/170…	Gasu_43430/Gasu_51810/Gasu_63700/Gasu_19110/Gasu_34920/Gasu_01220/Gasu_12760/Gasu_00280/Gasu_00270/Gasu_57270/Gasu_34220/Gasu_06180/Gasu_18680/Gasu_26210/Gasu_18810/Gasu_18730/Gasu_42990/Gasu_55950/Gasu_54520/Gasu_29510/Gasu_08090/Gasu_29040/Gasu_52020/Gasu_34490/Gasu_39730/Gasu_35130/Gasu_24010/Gasu_20560/Gasu_51580/Gasu_36380/Gasu_20930/Gasu_17370/Gasu_47570/Gasu_61420/Gasu_39740/Gasu_06940/Gas…	81	55	17087038/17089592/17087925/17090240/17091218/17085569/17088038/17090801/17089549/17088794/17089562/17089554/17086993/17085756/17085943/17088507/17090666/17088459/17086149/17087881/17087946/17088991/17089314/17086225/17087738/17089351/17089664/17086655/17085200/17087457/17090877/17085589/17090031/17086388/17090783/17089814/17086915/17089425/17086085/17089063/17089222/17090558/17085958/17087806/170…	26	17086128/17084965/17091312/17091217/17087456/17087580/17085558/17089869/17086170/17089654/17085501/17087322/17087326/17085836/17087320/17085750/17087344/17087325/17087324/17087323/17085071/17087307/17087319/17087292/17087348/17087318
CC	GO:0009579	thylakoid	24/201	25/802	2.49651746400898e-14	5.32590392321917e-13	17087980/17088681/17087006/17089797/17088679/17087878/17084837/17087331/17091199/17087333/17087376/17087302/17087343/17087291/17087342/17087332/17087290/17087359/17087295/17087296/17087355/17087386/17087356/17087383	Gasu_33650/Gasu_27040/Gasu_43120/Gasu_16200/Gasu_27020/Gasu_34460/Gasu_64970/Gasu_40440/Gasu_00090/Gasu_40460/Gasu_40270/Gasu_40150/Gasu_40550/Gasu_40040/Gasu_40540/Gasu_40450/Gasu_40030/Gasu_40710/Gasu_40080/Gasu_40090/Gasu_40670/Gasu_40480/Gasu_40680/Gasu_40700	24	0		24	17087980/17088681/17087006/17089797/17088679/17087878/17084837/17087331/17091199/17087333/17087376/17087302/17087343/17087291/17087342/17087332/17087290/17087359/17087295/17087296/17087355/17087386/17087356/17087383
CC	GO:0034357	photosynthetic membrane	24/201	25/802	2.49651746400898e-14	5.32590392321917e-13	17087980/17088681/17087006/17089797/17088679/17087878/17084837/17087331/17091199/17087333/17087376/17087302/17087343/17087291/17087342/17087332/17087290/17087359/17087295/17087296/17087355/17087386/17087356/17087383	Gasu_33650/Gasu_27040/Gasu_43120/Gasu_16200/Gasu_27020/Gasu_34460/Gasu_64970/Gasu_40440/Gasu_00090/Gasu_40460/Gasu_40270/Gasu_40150/Gasu_40550/Gasu_40040/Gasu_40540/Gasu_40450/Gasu_40030/Gasu_40710/Gasu_40080/Gasu_40090/Gasu_40670/Gasu_40480/Gasu_40680/Gasu_40700	24	0		24	17087980/17088681/17087006/17089797/17088679/17087878/17084837/17087331/17091199/17087333/17087376/17087302/17087343/17087291/17087342/17087332/17087290/17087359/17087295/17087296/17087355/17087386/17087356/17087383
CC	GO:0044436	thylakoid part	24/201	25/802	2.49651746400898e-14	5.32590392321917e-13	17087980/17088681/17087006/17089797/17088679/17087878/17084837/17087331/17091199/17087333/17087376/17087302/17087343/17087291/17087342/17087332/17087290/17087359/17087295/17087296/17087355/17087386/17087356/17087383	Gasu_33650/Gasu_27040/Gasu_43120/Gasu_16200/Gasu_27020/Gasu_34460/Gasu_64970/Gasu_40440/Gasu_00090/Gasu_40460/Gasu_40270/Gasu_40150/Gasu_40550/Gasu_40040/Gasu_40540/Gasu_40450/Gasu_40030/Gasu_40710/Gasu_40080/Gasu_40090/Gasu_40670/Gasu_40480/Gasu_40680/Gasu_40700	24	0		24	17087980/17088681/17087006/17089797/17088679/17087878/17084837/17087331/17091199/17087333/17087376/17087302/17087343/17087291/17087342/17087332/17087290/17087359/17087295/17087296/17087355/17087386/17087356/17087383
CC	GO:0005840	ribosome	50/201	93/802	2.0882295799633e-10	3.34116732794128e-09	17089592/17090240/17091218/17085569/17088038/17090801/17089549/17088794/17089562/17089554/17086993/17085756/17085943/17088507/17090666/17088459/17086149/17087881/17087946/17088991/17086225/17087738/17089351/17085200/17087457/17090877/17085589/17090031/17086388/17090783/17089814/17086915/17086085/17090558/17085958/17089654/17089833/17086423/17085202/17090610/17087322/17087326/17087320/17087325/170…	Gasu_19110/Gasu_12760/Gasu_00280/Gasu_57270/Gasu_34220/Gasu_06180/Gasu_18680/Gasu_26210/Gasu_18810/Gasu_18730/Gasu_42990/Gasu_55950/Gasu_54520/Gasu_29510/Gasu_08090/Gasu_29040/Gasu_52020/Gasu_34490/Gasu_35130/Gasu_24010/Gasu_51580/Gasu_36380/Gasu_20930/Gasu_61420/Gasu_39740/Gasu_06940/Gasu_57470/Gasu_13470/Gasu_49340/Gasu_06000/Gasu_16370/Gasu_43860/Gasu_52570/Gasu_10140/Gasu_53580/Gasu_17270/Gas…	50	39	17089592/17090240/17091218/17085569/17088038/17090801/17089549/17088794/17089562/17089554/17086993/17085756/17085943/17088507/17090666/17088459/17086149/17087881/17087946/17088991/17086225/17087738/17089351/17085200/17087457/17090877/17085589/17090031/17086388/17090783/17089814/17086915/17086085/17090558/17085958/17089833/17086423/17085202/17090610	11	17089654/17087322/17087326/17087320/17087325/17087324/17087323/17087307/17087319/17087348/17087318
CC	GO:0009521	photosystem	14/201	14/802	2.72071849423657e-09	3.48251967262281e-08	17088681/17087006/17088679/17084837/17087331/17091199/17087333/17087376/17087302/17087332/17087355/17087386/17087356/17087383	Gasu_27040/Gasu_43120/Gasu_27020/Gasu_64970/Gasu_40440/Gasu_00090/Gasu_40460/Gasu_40270/Gasu_40150/Gasu_40450/Gasu_40670/Gasu_40480/Gasu_40680/Gasu_40700	14	0		14	17088681/17087006/17088679/17084837/17087331/17091199/17087333/17087376/17087302/17087332/17087355/17087386/17087356/17087383
CC	GO:0043228	non-membrane-bounded organelle	60/201	133/802	2.2313701542537e-08	2.04010985531767e-07	17089592/17085010/17090240/17091218/17085569/17088038/17090801/17089549/17088794/17089562/17089554/17086993/17085756/17085943/17088507/17090666/17088459/17086149/17087881/17087946/17088991/17086225/17087738/17089351/17085200/17087457/17090877/17085589/17090031/17086388/17089713/17090783/17089814/17086915/17089270/17086085/17090558/17085958/17089654/17089833/17086423/17085202/17085187/17085392/170…	Gasu_19110/Gasu_63250/Gasu_12760/Gasu_00280/Gasu_57270/Gasu_34220/Gasu_06180/Gasu_18680/Gasu_26210/Gasu_18810/Gasu_18730/Gasu_42990/Gasu_55950/Gasu_54520/Gasu_29510/Gasu_08090/Gasu_29040/Gasu_52020/Gasu_34490/Gasu_35130/Gasu_24010/Gasu_51580/Gasu_36380/Gasu_20930/Gasu_61420/Gasu_39740/Gasu_06940/Gasu_57470/Gasu_13470/Gasu_49340/Gasu_17860/Gasu_06000/Gasu_16370/Gasu_43860/Gasu_22180/Gasu_52570/Gas…	60	48	17089592/17085010/17090240/17091218/17085569/17088038/17090801/17089549/17088794/17089562/17089554/17086993/17085756/17085943/17088507/17090666/17088459/17086149/17087881/17087946/17088991/17086225/17087738/17089351/17085200/17087457/17090877/17085589/17090031/17086388/17089713/17090783/17089814/17086915/17089270/17086085/17090558/17085958/17089833/17086423/17085202/17085187/17085392/17090610/170…	12	17089654/17087754/17087322/17087326/17087320/17087325/17087324/17087323/17087307/17087319/17087348/17087318
CC	GO:0043232	intracellular non-membrane-bounded organelle	60/201	133/802	2.2313701542537e-08	2.04010985531767e-07	17089592/17085010/17090240/17091218/17085569/17088038/17090801/17089549/17088794/17089562/17089554/17086993/17085756/17085943/17088507/17090666/17088459/17086149/17087881/17087946/17088991/17086225/17087738/17089351/17085200/17087457/17090877/17085589/17090031/17086388/17089713/17090783/17089814/17086915/17089270/17086085/17090558/17085958/17089654/17089833/17086423/17085202/17085187/17085392/170…	Gasu_19110/Gasu_63250/Gasu_12760/Gasu_00280/Gasu_57270/Gasu_34220/Gasu_06180/Gasu_18680/Gasu_26210/Gasu_18810/Gasu_18730/Gasu_42990/Gasu_55950/Gasu_54520/Gasu_29510/Gasu_08090/Gasu_29040/Gasu_52020/Gasu_34490/Gasu_35130/Gasu_24010/Gasu_51580/Gasu_36380/Gasu_20930/Gasu_61420/Gasu_39740/Gasu_06940/Gasu_57470/Gasu_13470/Gasu_49340/Gasu_17860/Gasu_06000/Gasu_16370/Gasu_43860/Gasu_22180/Gasu_52570/Gas…	60	48	17089592/17085010/17090240/17091218/17085569/17088038/17090801/17089549/17088794/17089562/17089554/17086993/17085756/17085943/17088507/17090666/17088459/17086149/17087881/17087946/17088991/17086225/17087738/17089351/17085200/17087457/17090877/17085589/17090031/17086388/17089713/17090783/17089814/17086915/17089270/17086085/17090558/17085958/17089833/17086423/17085202/17085187/17085392/17090610/170…	12	17089654/17087754/17087322/17087326/17087320/17087325/17087324/17087323/17087307/17087319/17087348/17087318
CC	GO:0042651	thylakoid membrane	14/201	15/802	3.17716390659452e-08	2.54173112527562e-07	17087980/17088681/17087006/17089797/17088679/17087878/17091199/17087343/17087291/17087342/17087290/17087359/17087295/17087296	Gasu_33650/Gasu_27040/Gasu_43120/Gasu_16200/Gasu_27020/Gasu_34460/Gasu_00090/Gasu_40550/Gasu_40040/Gasu_40540/Gasu_40030/Gasu_40710/Gasu_40080/Gasu_40090	14	0		14	17087980/17088681/17087006/17089797/17088679/17087878/17091199/17087343/17087291/17087342/17087290/17087359/17087295/17087296
CC	GO:1990904	ribonucleoprotein complex	50/201	113/802	1.11123446963025e-06	7.90211178403736e-06	17089592/17090240/17091218/17085569/17088038/17090801/17089549/17088794/17089562/17089554/17086993/17085756/17085943/17088507/17090666/17088459/17086149/17087881/17087946/17088991/17086225/17087738/17089351/17085200/17087457/17090877/17085589/17090031/17086388/17090783/17089814/17086915/17086085/17090558/17085958/17089654/17089833/17086423/17085202/17090610/17087322/17087326/17087320/17087325/170…	Gasu_19110/Gasu_12760/Gasu_00280/Gasu_57270/Gasu_34220/Gasu_06180/Gasu_18680/Gasu_26210/Gasu_18810/Gasu_18730/Gasu_42990/Gasu_55950/Gasu_54520/Gasu_29510/Gasu_08090/Gasu_29040/Gasu_52020/Gasu_34490/Gasu_35130/Gasu_24010/Gasu_51580/Gasu_36380/Gasu_20930/Gasu_61420/Gasu_39740/Gasu_06940/Gasu_57470/Gasu_13470/Gasu_49340/Gasu_06000/Gasu_16370/Gasu_43860/Gasu_52570/Gasu_10140/Gasu_53580/Gasu_17270/Gas…	50	39	17089592/17090240/17091218/17085569/17088038/17090801/17089549/17088794/17089562/17089554/17086993/17085756/17085943/17088507/17090666/17088459/17086149/17087881/17087946/17088991/17086225/17087738/17089351/17085200/17087457/17090877/17085589/17090031/17086388/17090783/17089814/17086915/17086085/17090558/17085958/17089833/17086423/17085202/17090610	11	17089654/17087322/17087326/17087320/17087325/17087324/17087323/17087307/17087319/17087348/17087318
CC	GO:0032991	protein-containing complex	91/201	280/802	0.000292804110079744	0.00187394630451036	17087980/17088681/17087006/17089797/17088679/17089592/17084837/17085010/17090240/17091218/17085569/17088038/17090801/17089549/17088794/17089562/17089554/17086993/17085756/17085943/17088507/17090666/17088459/17086149/17087881/17087946/17088991/17086225/17087738/17089351/17087109/17085200/17087457/17090877/17085589/17090031/17086388/17090783/17089814/17086915/17089869/17089270/17086085/17088660/170…	Gasu_33650/Gasu_27040/Gasu_43120/Gasu_16200/Gasu_27020/Gasu_19110/Gasu_64970/Gasu_63250/Gasu_12760/Gasu_00280/Gasu_57270/Gasu_34220/Gasu_06180/Gasu_18680/Gasu_26210/Gasu_18810/Gasu_18730/Gasu_42990/Gasu_55950/Gasu_54520/Gasu_29510/Gasu_08090/Gasu_29040/Gasu_52020/Gasu_34490/Gasu_35130/Gasu_24010/Gasu_51580/Gasu_36380/Gasu_20930/Gasu_42570/Gasu_61420/Gasu_39740/Gasu_06940/Gasu_57470/Gasu_13470/Gas…	91	52	17089592/17085010/17090240/17091218/17085569/17088038/17090801/17089549/17088794/17089562/17089554/17086993/17085756/17085943/17088507/17090666/17088459/17086149/17087881/17087946/17088991/17086225/17087738/17089351/17087109/17085200/17087457/17090877/17085589/17090031/17086388/17090783/17089814/17086915/17089270/17086085/17090558/17085958/17089833/17086423/17085202/17085187/17087938/17085392/170…	39	17087980/17088681/17087006/17089797/17088679/17084837/17089869/17088660/17089654/17087754/17087331/17088356/17091199/17087322/17087333/17087326/17087376/17087302/17087343/17087320/17087291/17087342/17087325/17087324/17087332/17087323/17087290/17087307/17087359/17087295/17087319/17087296/17087355/17087386/17087348/17087356/17087293/17087383/17087318
CC	GO:0044444	cytoplasmic part	62/201	180/802	0.000863003293560036	0.00502111007162202	17089592/17089047/17090240/17091218/17085569/17088038/17090801/17089549/17088794/17089562/17089554/17086993/17085756/17085943/17088507/17090666/17088459/17086149/17087881/17087946/17088991/17086225/17087738/17089351/17085200/17087457/17090877/17085589/17090031/17086388/17089545/17090527/17087899/17090783/17089814/17086915/17090556/17086085/17088864/17089222/17090558/17085958/17089654/17089833/170…	Gasu_19110/Gasu_24570/Gasu_12760/Gasu_00280/Gasu_57270/Gasu_34220/Gasu_06180/Gasu_18680/Gasu_26210/Gasu_18810/Gasu_18730/Gasu_42990/Gasu_55950/Gasu_54520/Gasu_29510/Gasu_08090/Gasu_29040/Gasu_52020/Gasu_34490/Gasu_35130/Gasu_24010/Gasu_51580/Gasu_36380/Gasu_20930/Gasu_61420/Gasu_39740/Gasu_06940/Gasu_57470/Gasu_13470/Gasu_49340/Gasu_18640/Gasu_09830/Gasu_34670/Gasu_06000/Gasu_16370/Gasu_43860/Gas…	62	46	17089592/17089047/17090240/17091218/17085569/17088038/17090801/17089549/17088794/17089562/17089554/17086993/17085756/17085943/17088507/17090666/17088459/17086149/17087881/17087946/17088991/17086225/17087738/17089351/17085200/17087457/17090877/17085589/17090031/17086388/17089545/17087899/17090783/17089814/17086915/17086085/17088864/17089222/17090558/17085958/17089833/17086423/17085202/17087938/170…	16	17090527/17090556/17089654/17089803/17087322/17087326/17087320/17089219/17087325/17087324/17087323/17087307/17087319/17087348/17087293/17087318
CC	GO:0098796	membrane protein complex	25/201	60/802	0.00248621020472402	0.0132597877585281	17087980/17088681/17087006/17089797/17088679/17084837/17089869/17087938/17087331/17091199/17087333/17087376/17087302/17087343/17087291/17087342/17087332/17087290/17087359/17087295/17087296/17087355/17087386/17087356/17087383	Gasu_33650/Gasu_27040/Gasu_43120/Gasu_16200/Gasu_27020/Gasu_64970/Gasu_14490/Gasu_35050/Gasu_40440/Gasu_00090/Gasu_40460/Gasu_40270/Gasu_40150/Gasu_40550/Gasu_40040/Gasu_40540/Gasu_40450/Gasu_40030/Gasu_40710/Gasu_40080/Gasu_40090/Gasu_40670/Gasu_40480/Gasu_40680/Gasu_40700	25	1	17087938	24	17087980/17088681/17087006/17089797/17088679/17084837/17089869/17087331/17091199/17087333/17087376/17087302/17087343/17087291/17087342/17087332/17087290/17087359/17087295/17087296/17087355/17087386/17087356/17087383
CC	GO:0044815	DNA packaging complex	7/201	10/802	0.00335809351828754	0.0165321527054156	17085010/17089270/17085187/17085392/17087754/17085013/17085112	Gasu_63250/Gasu_22180/Gasu_61570/Gasu_59660/Gasu_36540/Gasu_63240/Gasu_62230	7	6	17085010/17089270/17085187/17085392/17085013/17085112	1	17087754
MF	GO:0003735	structural constituent of ribosome	50/505	94/2551	1.98349315301911e-13	2.81656027728714e-11	17089592/17090240/17091218/17085569/17088038/17090801/17089549/17088794/17089562/17089554/17086993/17085756/17085943/17088507/17090666/17088459/17086149/17087881/17087946/17088991/17086225/17087738/17089351/17085200/17087457/17090877/17085589/17090031/17086388/17090783/17089814/17086915/17086085/17090558/17085958/17089654/17089833/17086423/17085202/17090610/17087322/17087326/17087320/17087325/170…	Gasu_19110/Gasu_12760/Gasu_00280/Gasu_57270/Gasu_34220/Gasu_06180/Gasu_18680/Gasu_26210/Gasu_18810/Gasu_18730/Gasu_42990/Gasu_55950/Gasu_54520/Gasu_29510/Gasu_08090/Gasu_29040/Gasu_52020/Gasu_34490/Gasu_35130/Gasu_24010/Gasu_51580/Gasu_36380/Gasu_20930/Gasu_61420/Gasu_39740/Gasu_06940/Gasu_57470/Gasu_13470/Gasu_49340/Gasu_06000/Gasu_16370/Gasu_43860/Gasu_52570/Gasu_10140/Gasu_53580/Gasu_17270/Gas…	50	39	17089592/17090240/17091218/17085569/17088038/17090801/17089549/17088794/17089562/17089554/17086993/17085756/17085943/17088507/17090666/17088459/17086149/17087881/17087946/17088991/17086225/17087738/17089351/17085200/17087457/17090877/17085589/17090031/17086388/17090783/17089814/17086915/17086085/17090558/17085958/17089833/17086423/17085202/17090610	11	17089654/17087322/17087326/17087320/17087325/17087324/17087323/17087307/17087319/17087348/17087318
MF	GO:0005198	structural molecule activity	50/505	104/2551	2.94280231126766e-11	2.08938964100004e-09	17089592/17090240/17091218/17085569/17088038/17090801/17089549/17088794/17089562/17089554/17086993/17085756/17085943/17088507/17090666/17088459/17086149/17087881/17087946/17088991/17086225/17087738/17089351/17085200/17087457/17090877/17085589/17090031/17086388/17090783/17089814/17086915/17086085/17090558/17085958/17089654/17089833/17086423/17085202/17090610/17087322/17087326/17087320/17087325/170…	Gasu_19110/Gasu_12760/Gasu_00280/Gasu_57270/Gasu_34220/Gasu_06180/Gasu_18680/Gasu_26210/Gasu_18810/Gasu_18730/Gasu_42990/Gasu_55950/Gasu_54520/Gasu_29510/Gasu_08090/Gasu_29040/Gasu_52020/Gasu_34490/Gasu_35130/Gasu_24010/Gasu_51580/Gasu_36380/Gasu_20930/Gasu_61420/Gasu_39740/Gasu_06940/Gasu_57470/Gasu_13470/Gasu_49340/Gasu_06000/Gasu_16370/Gasu_43860/Gasu_52570/Gasu_10140/Gasu_53580/Gasu_17270/Gas…	50	39	17089592/17090240/17091218/17085569/17088038/17090801/17089549/17088794/17089562/17089554/17086993/17085756/17085943/17088507/17090666/17088459/17086149/17087881/17087946/17088991/17086225/17087738/17089351/17085200/17087457/17090877/17085589/17090031/17086388/17090783/17089814/17086915/17086085/17090558/17085958/17089833/17086423/17085202/17090610	11	17089654/17087322/17087326/17087320/17087325/17087324/17087323/17087307/17087319/17087348/17087318
MF	GO:0016491	oxidoreductase activity	94/505	277/2551	2.79870834763677e-09	1.32472195121474e-07	17085140/17086365/17089707/17085529/17088681/17085155/17088843/17086641/17085248/17085494/17091114/17088661/17085644/17087878/17089447/17086305/17085531/17090047/17088086/17085623/17090382/17087456/17085552/17088036/17089736/17089931/17085915/17085558/17090369/17091274/17090457/17085297/17086558/17087493/17088548/17085972/17088509/17090855/17088864/17088508/17087190/17086776/17089268/17090387/170…	Gasu_62010/Gasu_50490/Gasu_17800/Gasu_57960/Gasu_27040/Gasu_61820/Gasu_24710/Gasu_47430/Gasu_60980/Gasu_58490/Gasu_03180/Gasu_26840/Gasu_56920/Gasu_34460/Gasu_19790/Gasu_49900/Gasu_57980/Gasu_13630/Gasu_32870/Gasu_57790/Gasu_11340/Gasu_39730/Gasu_58190/Gasu_34200/Gasu_18090/Gasu_15110/Gasu_54250/Gasu_58250/Gasu_11210/Gasu_00840/Gasu_09130/Gasu_60470/Gasu_48130/Gasu_38460/Gasu_27800/Gasu_53720/Gas…	94	24	17086365/17089707/17088843/17085552/17088036/17089931/17085915/17085972/17088509/17088864/17088508/17089268/17090387/17087794/17091242/17085884/17088390/17090793/17084928/17085590/17090147/17089071/17087977/17090611	70	17085140/17085529/17088681/17085155/17086641/17085248/17085494/17091114/17088661/17085644/17087878/17089447/17086305/17085531/17090047/17088086/17085623/17090382/17087456/17089736/17085558/17090369/17091274/17090457/17085297/17086558/17087493/17088548/17090855/17087190/17086776/17086899/17086742/17086457/17087659/17087360/17085050/17085017/17086442/17090885/17090248/17086741/17087008/17087689/170…
MF	GO:0048037	cofactor binding	52/505	178/2551	0.00115425478736531	0.0409760449514685	17086365/17089707/17085248/17088661/17085644/17087878/17086305/17088363/17090382/17087434/17087456/17085552/17088036/17089931/17085915/17085297/17087493/17090855/17088238/17086776/17090387/17087794/17087620/17086742/17089445/17089798/17090659/17085806/17087659/17084928/17085585/17087360/17086046/17085050/17089071/17090947/17088710/17085723/17086808/17087008/17087376/17087302/17089180/17086258/170…	Gasu_50490/Gasu_17800/Gasu_60980/Gasu_26840/Gasu_56920/Gasu_34460/Gasu_49900/Gasu_30180/Gasu_11340/Gasu_39510/Gasu_39730/Gasu_58190/Gasu_34200/Gasu_15110/Gasu_54250/Gasu_60470/Gasu_38460/Gasu_06720/Gasu_30840/Gasu_45590/Gasu_11390/Gasu_35340/Gasu_38180/Gasu_46810/Gasu_19770/Gasu_16210/Gasu_08020/Gasu_55420/Gasu_37030/Gasu_64070/Gasu_57430/Gasu_40720/Gasu_53340/Gasu_62880/Gasu_22460/Gasu_04500/Gas…	52	14	17086365/17089707/17085552/17088036/17089931/17085915/17090387/17087794/17087620/17089445/17084928/17086046/17089071/17085723	38	17085248/17088661/17085644/17087878/17086305/17088363/17090382/17087434/17087456/17085297/17087493/17090855/17088238/17086776/17086742/17089798/17090659/17085806/17087659/17085585/17087360/17085050/17090947/17088710/17086808/17087008/17087376/17087302/17089180/17086258/17089219/17086212/17084869/17087372/17085893/17089906/17087315/17087294

## Sheet: GLYvsPHOT_All-GO
Category	GOID	Description	GeneRatio	BgRatio	pvalue	padj	geneID	geneName	Count	Up	Up_Gene_id	Down	Down_Gene_id
BP	GO:0015979	photosynthesis	23/349	27/1688	7.62351053920961e-13	1.97448922965529e-10	17087980/17088681/17089797/17088679/17087006/17084837/17085313/17087815/17087332/17087291/17087333/17087297/17087343/17087376/17087342/17087331/17087302/17087290/17087296/17087355/17087386/17087359/17087356	Gasu_33650/Gasu_27040/Gasu_16200/Gasu_27020/Gasu_43120/Gasu_64970/Gasu_60110/Gasu_35550/Gasu_40450/Gasu_40040/Gasu_40460/Gasu_40100/Gasu_40550/Gasu_40270/Gasu_40540/Gasu_40440/Gasu_40150/Gasu_40030/Gasu_40090/Gasu_40670/Gasu_40480/Gasu_40710/Gasu_40680	23	0		23	17087980/17088681/17089797/17088679/17087006/17084837/17085313/17087815/17087332/17087291/17087333/17087297/17087343/17087376/17087342/17087331/17087302/17087290/17087296/17087355/17087386/17087359/17087356
BP	GO:0006412	translation	62/349	148/1688	5.75550132828309e-10	7.4533742201266e-08	17090240/17087881/17087738/17089592/17088038/17085200/17089562/17085569/17091218/17090666/17088459/17090801/17087946/17089554/17089664/17086993/17085756/17088991/17085202/17089549/17090558/17088507/17090877/17087751/17085958/17089314/17089351/17087457/17086388/17090619/17090783/17090031/17085589/17089814/17087667/17089425/17086149/17088126/17089588/17086915/17086225/17090610/17088649/17089833/170…	Gasu_12760/Gasu_34490/Gasu_36380/Gasu_19110/Gasu_34220/Gasu_61420/Gasu_18810/Gasu_57270/Gasu_00280/Gasu_08090/Gasu_29040/Gasu_06180/Gasu_35130/Gasu_18730/Gasu_17370/Gasu_42990/Gasu_55950/Gasu_24010/Gasu_61400/Gasu_18680/Gasu_10140/Gasu_29510/Gasu_06940/Gasu_36510/Gasu_53580/Gasu_20560/Gasu_20930/Gasu_39740/Gasu_49340/Gasu_07620/Gasu_06000/Gasu_13470/Gasu_57470/Gasu_16370/Gasu_37110/Gasu_19580/Gas…	62	52	17090240/17087881/17087738/17089592/17088038/17085200/17089562/17085569/17091218/17090666/17088459/17090801/17087946/17089554/17089664/17086993/17085756/17088991/17085202/17089549/17090558/17088507/17090877/17087751/17085958/17089314/17089351/17087457/17086388/17090619/17090783/17090031/17085589/17089814/17087667/17089425/17086149/17088126/17089588/17086915/17086225/17090610/17088649/17089833/170…	10	17085567/17087322/17087326/17087320/17087325/17087324/17087323/17087307/17087319/17087348
BP	GO:0043043	peptide biosynthetic process	62/349	151/1688	1.56035627303639e-09	1.34710758238809e-07	17090240/17087881/17087738/17089592/17088038/17085200/17089562/17085569/17091218/17090666/17088459/17090801/17087946/17089554/17089664/17086993/17085756/17088991/17085202/17089549/17090558/17088507/17090877/17087751/17085958/17089314/17089351/17087457/17086388/17090619/17090783/17090031/17085589/17089814/17087667/17089425/17086149/17088126/17089588/17086915/17086225/17090610/17088649/17089833/170…	Gasu_12760/Gasu_34490/Gasu_36380/Gasu_19110/Gasu_34220/Gasu_61420/Gasu_18810/Gasu_57270/Gasu_00280/Gasu_08090/Gasu_29040/Gasu_06180/Gasu_35130/Gasu_18730/Gasu_17370/Gasu_42990/Gasu_55950/Gasu_24010/Gasu_61400/Gasu_18680/Gasu_10140/Gasu_29510/Gasu_06940/Gasu_36510/Gasu_53580/Gasu_20560/Gasu_20930/Gasu_39740/Gasu_49340/Gasu_07620/Gasu_06000/Gasu_13470/Gasu_57470/Gasu_16370/Gasu_37110/Gasu_19580/Gas…	62	52	17090240/17087881/17087738/17089592/17088038/17085200/17089562/17085569/17091218/17090666/17088459/17090801/17087946/17089554/17089664/17086993/17085756/17088991/17085202/17089549/17090558/17088507/17090877/17087751/17085958/17089314/17089351/17087457/17086388/17090619/17090783/17090031/17085589/17089814/17087667/17089425/17086149/17088126/17089588/17086915/17086225/17090610/17088649/17089833/170…	10	17085567/17087322/17087326/17087320/17087325/17087324/17087323/17087307/17087319/17087348
BP	GO:0006518	peptide metabolic process	62/349	154/1688	4.0555255084538e-09	2.62595276672383e-07	17090240/17087881/17087738/17089592/17088038/17085200/17089562/17085569/17091218/17090666/17088459/17090801/17087946/17089554/17089664/17086993/17085756/17088991/17085202/17089549/17090558/17088507/17090877/17087751/17085958/17089314/17089351/17087457/17086388/17090619/17090783/17090031/17085589/17089814/17087667/17089425/17086149/17088126/17089588/17086915/17086225/17090610/17088649/17089833/170…	Gasu_12760/Gasu_34490/Gasu_36380/Gasu_19110/Gasu_34220/Gasu_61420/Gasu_18810/Gasu_57270/Gasu_00280/Gasu_08090/Gasu_29040/Gasu_06180/Gasu_35130/Gasu_18730/Gasu_17370/Gasu_42990/Gasu_55950/Gasu_24010/Gasu_61400/Gasu_18680/Gasu_10140/Gasu_29510/Gasu_06940/Gasu_36510/Gasu_53580/Gasu_20560/Gasu_20930/Gasu_39740/Gasu_49340/Gasu_07620/Gasu_06000/Gasu_13470/Gasu_57470/Gasu_16370/Gasu_37110/Gasu_19580/Gas…	62	52	17090240/17087881/17087738/17089592/17088038/17085200/17089562/17085569/17091218/17090666/17088459/17090801/17087946/17089554/17089664/17086993/17085756/17088991/17085202/17089549/17090558/17088507/17090877/17087751/17085958/17089314/17089351/17087457/17086388/17090619/17090783/17090031/17085589/17089814/17087667/17089425/17086149/17088126/17089588/17086915/17086225/17090610/17088649/17089833/170…	10	17085567/17087322/17087326/17087320/17087325/17087324/17087323/17087307/17087319/17087348
BP	GO:0043604	amide biosynthetic process	62/349	157/1688	1.01267887930934e-08	5.24567659482236e-07	17090240/17087881/17087738/17089592/17088038/17085200/17089562/17085569/17091218/17090666/17088459/17090801/17087946/17089554/17089664/17086993/17085756/17088991/17085202/17089549/17090558/17088507/17090877/17087751/17085958/17089314/17089351/17087457/17086388/17090619/17090783/17090031/17085589/17089814/17087667/17089425/17086149/17088126/17089588/17086915/17086225/17090610/17088649/17089833/170…	Gasu_12760/Gasu_34490/Gasu_36380/Gasu_19110/Gasu_34220/Gasu_61420/Gasu_18810/Gasu_57270/Gasu_00280/Gasu_08090/Gasu_29040/Gasu_06180/Gasu_35130/Gasu_18730/Gasu_17370/Gasu_42990/Gasu_55950/Gasu_24010/Gasu_61400/Gasu_18680/Gasu_10140/Gasu_29510/Gasu_06940/Gasu_36510/Gasu_53580/Gasu_20560/Gasu_20930/Gasu_39740/Gasu_49340/Gasu_07620/Gasu_06000/Gasu_13470/Gasu_57470/Gasu_16370/Gasu_37110/Gasu_19580/Gas…	62	52	17090240/17087881/17087738/17089592/17088038/17085200/17089562/17085569/17091218/17090666/17088459/17090801/17087946/17089554/17089664/17086993/17085756/17088991/17085202/17089549/17090558/17088507/17090877/17087751/17085958/17089314/17089351/17087457/17086388/17090619/17090783/17090031/17085589/17089814/17087667/17089425/17086149/17088126/17089588/17086915/17086225/17090610/17088649/17089833/170…	10	17085567/17087322/17087326/17087320/17087325/17087324/17087323/17087307/17087319/17087348
BP	GO:0043603	cellular amide metabolic process	62/349	162/1688	4.28014867189449e-08	1.84759751003446e-06	17090240/17087881/17087738/17089592/17088038/17085200/17089562/17085569/17091218/17090666/17088459/17090801/17087946/17089554/17089664/17086993/17085756/17088991/17085202/17089549/17090558/17088507/17090877/17087751/17085958/17089314/17089351/17087457/17086388/17090619/17090783/17090031/17085589/17089814/17087667/17089425/17086149/17088126/17089588/17086915/17086225/17090610/17088649/17089833/170…	Gasu_12760/Gasu_34490/Gasu_36380/Gasu_19110/Gasu_34220/Gasu_61420/Gasu_18810/Gasu_57270/Gasu_00280/Gasu_08090/Gasu_29040/Gasu_06180/Gasu_35130/Gasu_18730/Gasu_17370/Gasu_42990/Gasu_55950/Gasu_24010/Gasu_61400/Gasu_18680/Gasu_10140/Gasu_29510/Gasu_06940/Gasu_36510/Gasu_53580/Gasu_20560/Gasu_20930/Gasu_39740/Gasu_49340/Gasu_07620/Gasu_06000/Gasu_13470/Gasu_57470/Gasu_16370/Gasu_37110/Gasu_19580/Gas…	62	52	17090240/17087881/17087738/17089592/17088038/17085200/17089562/17085569/17091218/17090666/17088459/17090801/17087946/17089554/17089664/17086993/17085756/17088991/17085202/17089549/17090558/17088507/17090877/17087751/17085958/17089314/17089351/17087457/17086388/17090619/17090783/17090031/17085589/17089814/17087667/17089425/17086149/17088126/17089588/17086915/17086225/17090610/17088649/17089833/170…	10	17085567/17087322/17087326/17087320/17087325/17087324/17087323/17087307/17087319/17087348
BP	GO:0055114	oxidation-reduction process	82/349	261/1688	5.38281448547298e-06	0.0001991641359625	17085140/17086365/17085529/17090388/17085155/17086641/17088810/17085248/17085972/17091114/17085644/17088661/17090382/17085623/17089707/17090047/17089447/17088843/17087794/17087746/17089931/17087878/17088919/17085915/17085428/17088390/17091080/17085297/17091252/17087606/17088508/17088185/17090387/17088509/17085558/17087456/17085884/17085552/17087493/17090793/17088548/17090855/17090725/17086742/170…	Gasu_62010/Gasu_50490/Gasu_57960/Gasu_11400/Gasu_61820/Gasu_47430/Gasu_26370/Gasu_60980/Gasu_53720/Gasu_03180/Gasu_56920/Gasu_26840/Gasu_11340/Gasu_57790/Gasu_17800/Gasu_13630/Gasu_19790/Gasu_24710/Gasu_35340/Gasu_36460/Gasu_15110/Gasu_34460/Gasu_25470/Gasu_54250/Gasu_59410/Gasu_30450/Gasu_02840/Gasu_60470/Gasu_00620/Gasu_38040/Gasu_29520/Gasu_32100/Gasu_11390/Gasu_29530/Gasu_58250/Gasu_39730/Gas…	82	31	17086365/17085972/17089707/17088843/17087794/17087746/17089931/17088919/17085915/17085428/17088390/17091080/17091252/17087606/17088508/17088185/17090387/17088509/17085884/17085552/17090793/17090725/17085590/17087726/17085596/17089071/17090147/17087977/17087789/17084928/17088036	51	17085140/17085529/17090388/17085155/17086641/17088810/17085248/17091114/17085644/17088661/17090382/17085623/17090047/17089447/17087878/17085297/17085558/17087456/17087493/17088548/17090855/17086742/17085531/17085017/17086774/17088086/17087689/17085585/17085050/17086741/17085845/17086117/17085530/17090248/17087287/17089808/17087297/17087376/17087292/17086212/17087336/17085338/17089219/17087288/170…
BP	GO:1901566	organonitrogen compound biosynthetic process	81/349	268/1688	3.38203496469089e-05	0.00109493381981868	17090240/17087881/17087738/17089592/17088038/17085200/17089562/17085569/17091218/17086128/17090666/17088459/17090801/17087946/17089554/17089664/17086993/17085756/17088991/17085202/17087925/17089549/17090558/17088507/17087806/17090877/17087751/17085958/17084965/17089314/17089351/17087457/17086388/17090619/17090783/17090031/17085589/17087038/17089814/17087667/17089425/17086149/17088126/17089588/170…	Gasu_12760/Gasu_34490/Gasu_36380/Gasu_19110/Gasu_34220/Gasu_61420/Gasu_18810/Gasu_57270/Gasu_00280/Gasu_51810/Gasu_08090/Gasu_29040/Gasu_06180/Gasu_35130/Gasu_18730/Gasu_17370/Gasu_42990/Gasu_55950/Gasu_24010/Gasu_61400/Gasu_34920/Gasu_18680/Gasu_10140/Gasu_29510/Gasu_35460/Gasu_06940/Gasu_36510/Gasu_53580/Gasu_63700/Gasu_20560/Gasu_20930/Gasu_39740/Gasu_49340/Gasu_07620/Gasu_06000/Gasu_13470/Gas…	81	60	17090240/17087881/17087738/17089592/17088038/17085200/17089562/17085569/17091218/17090666/17088459/17090801/17087946/17089554/17089664/17086993/17085756/17088991/17085202/17087925/17089549/17090558/17088507/17087806/17090877/17087751/17085958/17089314/17089351/17087457/17086388/17090619/17090783/17090031/17085589/17087038/17089814/17087667/17089425/17086149/17088126/17089588/17086915/17086225/170…	21	17086128/17084965/17091217/17085558/17087456/17086170/17089869/17085567/17084921/17087322/17087292/17085836/17087326/17087320/17087344/17087325/17087324/17087323/17087307/17087319/17087348
BP	GO:0009059	macromolecule biosynthetic process	88/349	302/1688	6.86284266679642e-05	0.00177747625070027	17090240/17087881/17087738/17089592/17088038/17085200/17089562/17085569/17091218/17090666/17088459/17090801/17087946/17087822/17089554/17089664/17086993/17085756/17088991/17085202/17089549/17088843/17090558/17088507/17087806/17090877/17087751/17085958/17089314/17089351/17087457/17086388/17088431/17090619/17090783/17090031/17085589/17089814/17087667/17088660/17087444/17089425/17086149/17088126/170…	Gasu_12760/Gasu_34490/Gasu_36380/Gasu_19110/Gasu_34220/Gasu_61420/Gasu_18810/Gasu_57270/Gasu_00280/Gasu_08090/Gasu_29040/Gasu_06180/Gasu_35130/Gasu_35620/Gasu_18730/Gasu_17370/Gasu_42990/Gasu_55950/Gasu_24010/Gasu_61400/Gasu_18680/Gasu_24710/Gasu_10140/Gasu_29510/Gasu_35460/Gasu_06940/Gasu_36510/Gasu_53580/Gasu_20560/Gasu_20930/Gasu_39740/Gasu_49340/Gasu_28760/Gasu_07620/Gasu_06000/Gasu_13470/Gas…	88	67	17090240/17087881/17087738/17089592/17088038/17085200/17089562/17085569/17091218/17090666/17088459/17090801/17087946/17087822/17089554/17089664/17086993/17085756/17088991/17085202/17089549/17088843/17090558/17088507/17087806/17090877/17087751/17085958/17089314/17089351/17087457/17086388/17090619/17090783/17090031/17085589/17089814/17087667/17089425/17086149/17088126/17089588/17086915/17086225/170…	21	17088431/17088660/17087444/17086198/17090338/17087802/17087984/17085567/17087347/17087322/17087326/17087320/17087325/17087324/17087515/17087323/17087307/17087388/17087391/17087319/17087348
BP	GO:0034645	cellular macromolecule biosynthetic process	88/349	302/1688	6.86284266679642e-05	0.00177747625070027	17090240/17087881/17087738/17089592/17088038/17085200/17089562/17085569/17091218/17090666/17088459/17090801/17087946/17087822/17089554/17089664/17086993/17085756/17088991/17085202/17089549/17088843/17090558/17088507/17087806/17090877/17087751/17085958/17089314/17089351/17087457/17086388/17088431/17090619/17090783/17090031/17085589/17089814/17087667/17088660/17087444/17089425/17086149/17088126/170…	Gasu_12760/Gasu_34490/Gasu_36380/Gasu_19110/Gasu_34220/Gasu_61420/Gasu_18810/Gasu_57270/Gasu_00280/Gasu_08090/Gasu_29040/Gasu_06180/Gasu_35130/Gasu_35620/Gasu_18730/Gasu_17370/Gasu_42990/Gasu_55950/Gasu_24010/Gasu_61400/Gasu_18680/Gasu_24710/Gasu_10140/Gasu_29510/Gasu_35460/Gasu_06940/Gasu_36510/Gasu_53580/Gasu_20560/Gasu_20930/Gasu_39740/Gasu_49340/Gasu_28760/Gasu_07620/Gasu_06000/Gasu_13470/Gas…	88	67	17090240/17087881/17087738/17089592/17088038/17085200/17089562/17085569/17091218/17090666/17088459/17090801/17087946/17087822/17089554/17089664/17086993/17085756/17088991/17085202/17089549/17088843/17090558/17088507/17087806/17090877/17087751/17085958/17089314/17089351/17087457/17086388/17090619/17090783/17090031/17085589/17089814/17087667/17089425/17086149/17088126/17089588/17086915/17086225/170…	21	17088431/17088660/17087444/17086198/17090338/17087802/17087984/17085567/17087347/17087322/17087326/17087320/17087325/17087324/17087515/17087323/17087307/17087388/17087391/17087319/17087348
CC	GO:0005840	ribosome	55/190	93/802	3.81788746895399e-15	2.25255360668286e-13	17090240/17087881/17087738/17089592/17088038/17085200/17089562/17085569/17091218/17090666/17088459/17090801/17087946/17089554/17086993/17085756/17088991/17085202/17089549/17090558/17088507/17090877/17087751/17085958/17089351/17087457/17086388/17090619/17090783/17090031/17085589/17089814/17087667/17086149/17088126/17086915/17086225/17090610/17088649/17089833/17086085/17086423/17085568/17087832/170…	Gasu_12760/Gasu_34490/Gasu_36380/Gasu_19110/Gasu_34220/Gasu_61420/Gasu_18810/Gasu_57270/Gasu_00280/Gasu_08090/Gasu_29040/Gasu_06180/Gasu_35130/Gasu_18730/Gasu_42990/Gasu_55950/Gasu_24010/Gasu_61400/Gasu_18680/Gasu_10140/Gasu_29510/Gasu_06940/Gasu_36510/Gasu_53580/Gasu_20930/Gasu_39740/Gasu_49340/Gasu_07620/Gasu_06000/Gasu_13470/Gasu_57470/Gasu_16370/Gasu_37110/Gasu_52020/Gasu_33260/Gasu_43860/Gas…	55	45	17090240/17087881/17087738/17089592/17088038/17085200/17089562/17085569/17091218/17090666/17088459/17090801/17087946/17089554/17086993/17085756/17088991/17085202/17089549/17090558/17088507/17090877/17087751/17085958/17089351/17087457/17086388/17090619/17090783/17090031/17085589/17089814/17087667/17086149/17088126/17086915/17086225/17090610/17088649/17089833/17086085/17086423/17085568/17087832/170…	10	17085567/17087322/17087326/17087320/17087325/17087324/17087323/17087307/17087319/17087348
CC	GO:0043228	non-membrane-bounded organelle	64/190	133/802	8.062867562435e-12	1.58569728727888e-10	17090240/17087881/17087738/17089592/17088038/17085200/17089562/17085569/17091218/17090666/17088459/17090801/17087946/17089554/17086993/17085756/17088991/17085010/17085202/17089549/17090558/17088507/17090877/17087751/17085958/17089351/17087457/17086388/17090619/17090783/17090031/17085589/17089814/17087667/17086149/17088126/17086915/17086225/17090610/17088649/17089833/17086085/17086423/17085568/170…	Gasu_12760/Gasu_34490/Gasu_36380/Gasu_19110/Gasu_34220/Gasu_61420/Gasu_18810/Gasu_57270/Gasu_00280/Gasu_08090/Gasu_29040/Gasu_06180/Gasu_35130/Gasu_18730/Gasu_42990/Gasu_55950/Gasu_24010/Gasu_63250/Gasu_61400/Gasu_18680/Gasu_10140/Gasu_29510/Gasu_06940/Gasu_36510/Gasu_53580/Gasu_20930/Gasu_39740/Gasu_49340/Gasu_07620/Gasu_06000/Gasu_13470/Gasu_57470/Gasu_16370/Gasu_37110/Gasu_52020/Gasu_33260/Gas…	64	53	17090240/17087881/17087738/17089592/17088038/17085200/17089562/17085569/17091218/17090666/17088459/17090801/17087946/17089554/17086993/17085756/17088991/17085010/17085202/17089549/17090558/17088507/17090877/17087751/17085958/17089351/17087457/17086388/17090619/17090783/17090031/17085589/17089814/17087667/17086149/17088126/17086915/17086225/17090610/17088649/17089833/17086085/17086423/17085568/170…	11	17087754/17085567/17087322/17087326/17087320/17087325/17087324/17087323/17087307/17087319/17087348
CC	GO:0043232	intracellular non-membrane-bounded organelle	64/190	133/802	8.062867562435e-12	1.58569728727888e-10	17090240/17087881/17087738/17089592/17088038/17085200/17089562/17085569/17091218/17090666/17088459/17090801/17087946/17089554/17086993/17085756/17088991/17085010/17085202/17089549/17090558/17088507/17090877/17087751/17085958/17089351/17087457/17086388/17090619/17090783/17090031/17085589/17089814/17087667/17086149/17088126/17086915/17086225/17090610/17088649/17089833/17086085/17086423/17085568/170…	Gasu_12760/Gasu_34490/Gasu_36380/Gasu_19110/Gasu_34220/Gasu_61420/Gasu_18810/Gasu_57270/Gasu_00280/Gasu_08090/Gasu_29040/Gasu_06180/Gasu_35130/Gasu_18730/Gasu_42990/Gasu_55950/Gasu_24010/Gasu_63250/Gasu_61400/Gasu_18680/Gasu_10140/Gasu_29510/Gasu_06940/Gasu_36510/Gasu_53580/Gasu_20930/Gasu_39740/Gasu_49340/Gasu_07620/Gasu_06000/Gasu_13470/Gasu_57470/Gasu_16370/Gasu_37110/Gasu_52020/Gasu_33260/Gas…	64	53	17090240/17087881/17087738/17089592/17088038/17085200/17089562/17085569/17091218/17090666/17088459/17090801/17087946/17089554/17086993/17085756/17088991/17085010/17085202/17089549/17090558/17088507/17090877/17087751/17085958/17089351/17087457/17086388/17090619/17090783/17090031/17085589/17089814/17087667/17086149/17088126/17086915/17086225/17090610/17088649/17089833/17086085/17086423/17085568/170…	11	17087754/17085567/17087322/17087326/17087320/17087325/17087324/17087323/17087307/17087319/17087348
CC	GO:0009579	thylakoid	21/190	25/802	1.52161793487154e-10	1.49625763595701e-09	17087980/17088681/17089797/17088679/17087006/17084837/17087878/17087332/17087291/17087333/17087343/17087376/17087342/17087331/17087302/17087290/17087296/17087355/17087386/17087359/17087356	Gasu_33650/Gasu_27040/Gasu_16200/Gasu_27020/Gasu_43120/Gasu_64970/Gasu_34460/Gasu_40450/Gasu_40040/Gasu_40460/Gasu_40550/Gasu_40270/Gasu_40540/Gasu_40440/Gasu_40150/Gasu_40030/Gasu_40090/Gasu_40670/Gasu_40480/Gasu_40710/Gasu_40680	21	0		21	17087980/17088681/17089797/17088679/17087006/17084837/17087878/17087332/17087291/17087333/17087343/17087376/17087342/17087331/17087302/17087290/17087296/17087355/17087386/17087359/17087356
CC	GO:0034357	photosynthetic membrane	21/190	25/802	1.52161793487154e-10	1.49625763595701e-09	17087980/17088681/17089797/17088679/17087006/17084837/17087878/17087332/17087291/17087333/17087343/17087376/17087342/17087331/17087302/17087290/17087296/17087355/17087386/17087359/17087356	Gasu_33650/Gasu_27040/Gasu_16200/Gasu_27020/Gasu_43120/Gasu_64970/Gasu_34460/Gasu_40450/Gasu_40040/Gasu_40460/Gasu_40550/Gasu_40270/Gasu_40540/Gasu_40440/Gasu_40150/Gasu_40030/Gasu_40090/Gasu_40670/Gasu_40480/Gasu_40710/Gasu_40680	21	0		21	17087980/17088681/17089797/17088679/17087006/17084837/17087878/17087332/17087291/17087333/17087343/17087376/17087342/17087331/17087302/17087290/17087296/17087355/17087386/17087359/17087356
CC	GO:0044436	thylakoid part	21/190	25/802	1.52161793487154e-10	1.49625763595701e-09	17087980/17088681/17089797/17088679/17087006/17084837/17087878/17087332/17087291/17087333/17087343/17087376/17087342/17087331/17087302/17087290/17087296/17087355/17087386/17087359/17087356	Gasu_33650/Gasu_27040/Gasu_16200/Gasu_27020/Gasu_43120/Gasu_64970/Gasu_34460/Gasu_40450/Gasu_40040/Gasu_40460/Gasu_40550/Gasu_40270/Gasu_40540/Gasu_40440/Gasu_40150/Gasu_40030/Gasu_40090/Gasu_40670/Gasu_40480/Gasu_40710/Gasu_40680	21	0		21	17087980/17088681/17089797/17088679/17087006/17084837/17087878/17087332/17087291/17087333/17087343/17087376/17087342/17087331/17087302/17087290/17087296/17087355/17087386/17087359/17087356
CC	GO:1990904	ribonucleoprotein complex	55/190	113/802	2.51928943930041e-10	2.12340109883892e-09	17090240/17087881/17087738/17089592/17088038/17085200/17089562/17085569/17091218/17090666/17088459/17090801/17087946/17089554/17086993/17085756/17088991/17085202/17089549/17090558/17088507/17090877/17087751/17085958/17089351/17087457/17086388/17090619/17090783/17090031/17085589/17089814/17087667/17086149/17088126/17086915/17086225/17090610/17088649/17089833/17086085/17086423/17085568/17087832/170…	Gasu_12760/Gasu_34490/Gasu_36380/Gasu_19110/Gasu_34220/Gasu_61420/Gasu_18810/Gasu_57270/Gasu_00280/Gasu_08090/Gasu_29040/Gasu_06180/Gasu_35130/Gasu_18730/Gasu_42990/Gasu_55950/Gasu_24010/Gasu_61400/Gasu_18680/Gasu_10140/Gasu_29510/Gasu_06940/Gasu_36510/Gasu_53580/Gasu_20930/Gasu_39740/Gasu_49340/Gasu_07620/Gasu_06000/Gasu_13470/Gasu_57470/Gasu_16370/Gasu_37110/Gasu_52020/Gasu_33260/Gasu_43860/Gas…	55	45	17090240/17087881/17087738/17089592/17088038/17085200/17089562/17085569/17091218/17090666/17088459/17090801/17087946/17089554/17086993/17085756/17088991/17085202/17089549/17090558/17088507/17090877/17087751/17085958/17089351/17087457/17086388/17090619/17090783/17090031/17085589/17089814/17087667/17086149/17088126/17086915/17086225/17090610/17088649/17089833/17086085/17086423/17085568/17087832/170…	10	17085567/17087322/17087326/17087320/17087325/17087324/17087323/17087307/17087319/17087348
CC	GO:0009521	photosystem	12/190	14/802	1.35962565895387e-06	1.00272392347848e-05	17088681/17088679/17087006/17084837/17087332/17087333/17087376/17087331/17087302/17087355/17087386/17087356	Gasu_27040/Gasu_27020/Gasu_43120/Gasu_64970/Gasu_40450/Gasu_40460/Gasu_40270/Gasu_40440/Gasu_40150/Gasu_40670/Gasu_40480/Gasu_40680	12	0		12	17088681/17088679/17087006/17084837/17087332/17087333/17087376/17087331/17087302/17087355/17087386/17087356
CC	GO:0042651	thylakoid membrane	12/190	15/802	5.38547084096604e-06	3.53047532907774e-05	17087980/17088681/17089797/17088679/17087006/17087878/17087291/17087343/17087342/17087290/17087296/17087359	Gasu_33650/Gasu_27040/Gasu_16200/Gasu_27020/Gasu_43120/Gasu_34460/Gasu_40040/Gasu_40550/Gasu_40540/Gasu_40030/Gasu_40090/Gasu_40710	12	0		12	17087980/17088681/17089797/17088679/17087006/17087878/17087291/17087343/17087342/17087290/17087296/17087359
CC	GO:0044444	cytoplasmic part	65/190	180/802	1.21687802675442e-05	7.1795803578511e-05	17090240/17087881/17087738/17089047/17089592/17088038/17085200/17089562/17085569/17091218/17090666/17088459/17090801/17087946/17089554/17086993/17085756/17088991/17085202/17089549/17090558/17088507/17090877/17087751/17085958/17089351/17087457/17086388/17090619/17090783/17090031/17085589/17089814/17087667/17086149/17088126/17089545/17086915/17088864/17086225/17090610/17088649/17089833/17086085/170…	Gasu_12760/Gasu_34490/Gasu_36380/Gasu_24570/Gasu_19110/Gasu_34220/Gasu_61420/Gasu_18810/Gasu_57270/Gasu_00280/Gasu_08090/Gasu_29040/Gasu_06180/Gasu_35130/Gasu_18730/Gasu_42990/Gasu_55950/Gasu_24010/Gasu_61400/Gasu_18680/Gasu_10140/Gasu_29510/Gasu_06940/Gasu_36510/Gasu_53580/Gasu_20930/Gasu_39740/Gasu_49340/Gasu_07620/Gasu_06000/Gasu_13470/Gasu_57470/Gasu_16370/Gasu_37110/Gasu_52020/Gasu_33260/Gas…	65	51	17090240/17087881/17087738/17089047/17089592/17088038/17085200/17089562/17085569/17091218/17090666/17088459/17090801/17087946/17089554/17086993/17085756/17088991/17085202/17089549/17090558/17088507/17090877/17087751/17085958/17089351/17087457/17086388/17090619/17090783/17090031/17085589/17089814/17087667/17086149/17088126/17089545/17086915/17088864/17086225/17090610/17088649/17089833/17086085/170…	14	17090527/17090556/17089803/17085567/17087322/17089219/17087326/17087320/17087325/17087324/17087323/17087307/17087319/17087348
CC	GO:0032991	protein-containing complex	89/190	280/802	6.81667787138942e-05	0.000365621813101796	17087980/17090240/17087881/17088681/17087738/17089797/17088679/17089592/17088038/17085200/17089562/17085569/17091218/17090666/17088459/17090801/17087946/17089554/17086993/17085756/17088991/17085010/17085202/17089549/17090558/17088507/17087006/17090877/17087751/17085958/17084837/17089351/17087457/17086388/17090619/17090783/17090031/17085589/17089814/17087667/17088660/17086149/17088126/17086915/170…	Gasu_33650/Gasu_12760/Gasu_34490/Gasu_27040/Gasu_36380/Gasu_16200/Gasu_27020/Gasu_19110/Gasu_34220/Gasu_61420/Gasu_18810/Gasu_57270/Gasu_00280/Gasu_08090/Gasu_29040/Gasu_06180/Gasu_35130/Gasu_18730/Gasu_42990/Gasu_55950/Gasu_24010/Gasu_63250/Gasu_61400/Gasu_18680/Gasu_10140/Gasu_29510/Gasu_43120/Gasu_06940/Gasu_36510/Gasu_53580/Gasu_64970/Gasu_20930/Gasu_39740/Gasu_49340/Gasu_07620/Gasu_06000/Gas…	89	54	17090240/17087881/17087738/17089592/17088038/17085200/17089562/17085569/17091218/17090666/17088459/17090801/17087946/17089554/17086993/17085756/17088991/17085010/17085202/17089549/17090558/17088507/17090877/17087751/17085958/17089351/17087457/17086388/17090619/17090783/17090031/17085589/17089814/17087667/17086149/17088126/17086915/17086225/17090610/17088649/17089833/17086085/17086423/17087938/170…	35	17087980/17088681/17089797/17088679/17087006/17084837/17088660/17089869/17088356/17087754/17085567/17085684/17087332/17087291/17087333/17087322/17087343/17087376/17087342/17087331/17087326/17087302/17087320/17087325/17087324/17087290/17087296/17087323/17087355/17087386/17087307/17087359/17087319/17087356/17087348
CC	GO:0005737	cytoplasm	65/190	211/802	0.0035199954115784	0.0173066441069271	17090240/17087881/17087738/17089047/17089592/17088038/17085200/17089562/17085569/17091218/17090666/17088459/17090801/17087946/17089554/17086993/17085756/17088991/17085202/17089549/17090558/17088507/17090877/17087751/17085958/17089351/17087457/17086388/17090619/17090783/17090031/17085589/17089814/17087667/17086149/17088126/17089545/17086915/17088864/17086225/17090610/17088649/17089833/17086085/170…	Gasu_12760/Gasu_34490/Gasu_36380/Gasu_24570/Gasu_19110/Gasu_34220/Gasu_61420/Gasu_18810/Gasu_57270/Gasu_00280/Gasu_08090/Gasu_29040/Gasu_06180/Gasu_35130/Gasu_18730/Gasu_42990/Gasu_55950/Gasu_24010/Gasu_61400/Gasu_18680/Gasu_10140/Gasu_29510/Gasu_06940/Gasu_36510/Gasu_53580/Gasu_20930/Gasu_39740/Gasu_49340/Gasu_07620/Gasu_06000/Gasu_13470/Gasu_57470/Gasu_16370/Gasu_37110/Gasu_52020/Gasu_33260/Gas…	65	51	17090240/17087881/17087738/17089047/17089592/17088038/17085200/17089562/17085569/17091218/17090666/17088459/17090801/17087946/17089554/17086993/17085756/17088991/17085202/17089549/17090558/17088507/17090877/17087751/17085958/17089351/17087457/17086388/17090619/17090783/17090031/17085589/17089814/17087667/17086149/17088126/17089545/17086915/17088864/17086225/17090610/17088649/17089833/17086085/170…	14	17090527/17090556/17089803/17085567/17087322/17089219/17087326/17087320/17087325/17087324/17087323/17087307/17087319/17087348
MF	GO:0003735	structural constituent of ribosome	55/458	94/2551	2.78188929739618e-19	3.95028280230258e-17	17090240/17087881/17087738/17089592/17088038/17085200/17089562/17085569/17091218/17090666/17088459/17090801/17087946/17089554/17086993/17085756/17088991/17085202/17089549/17090558/17088507/17090877/17087751/17085958/17089351/17087457/17086388/17090619/17090783/17090031/17085589/17089814/17087667/17086149/17088126/17086915/17086225/17090610/17088649/17089833/17086085/17086423/17085568/17087832/170…	Gasu_12760/Gasu_34490/Gasu_36380/Gasu_19110/Gasu_34220/Gasu_61420/Gasu_18810/Gasu_57270/Gasu_00280/Gasu_08090/Gasu_29040/Gasu_06180/Gasu_35130/Gasu_18730/Gasu_42990/Gasu_55950/Gasu_24010/Gasu_61400/Gasu_18680/Gasu_10140/Gasu_29510/Gasu_06940/Gasu_36510/Gasu_53580/Gasu_20930/Gasu_39740/Gasu_49340/Gasu_07620/Gasu_06000/Gasu_13470/Gasu_57470/Gasu_16370/Gasu_37110/Gasu_52020/Gasu_33260/Gasu_43860/Gas…	55	45	17090240/17087881/17087738/17089592/17088038/17085200/17089562/17085569/17091218/17090666/17088459/17090801/17087946/17089554/17086993/17085756/17088991/17085202/17089549/17090558/17088507/17090877/17087751/17085958/17089351/17087457/17086388/17090619/17090783/17090031/17085589/17089814/17087667/17086149/17088126/17086915/17086225/17090610/17088649/17089833/17086085/17086423/17085568/17087832/170…	10	17085567/17087322/17087326/17087320/17087325/17087324/17087323/17087307/17087319/17087348
MF	GO:0005198	structural molecule activity	55/458	104/2551	1.5303536083413e-16	1.08655106192232e-14	17090240/17087881/17087738/17089592/17088038/17085200/17089562/17085569/17091218/17090666/17088459/17090801/17087946/17089554/17086993/17085756/17088991/17085202/17089549/17090558/17088507/17090877/17087751/17085958/17089351/17087457/17086388/17090619/17090783/17090031/17085589/17089814/17087667/17086149/17088126/17086915/17086225/17090610/17088649/17089833/17086085/17086423/17085568/17087832/170…	Gasu_12760/Gasu_34490/Gasu_36380/Gasu_19110/Gasu_34220/Gasu_61420/Gasu_18810/Gasu_57270/Gasu_00280/Gasu_08090/Gasu_29040/Gasu_06180/Gasu_35130/Gasu_18730/Gasu_42990/Gasu_55950/Gasu_24010/Gasu_61400/Gasu_18680/Gasu_10140/Gasu_29510/Gasu_06940/Gasu_36510/Gasu_53580/Gasu_20930/Gasu_39740/Gasu_49340/Gasu_07620/Gasu_06000/Gasu_13470/Gasu_57470/Gasu_16370/Gasu_37110/Gasu_52020/Gasu_33260/Gasu_43860/Gas…	55	45	17090240/17087881/17087738/17089592/17088038/17085200/17089562/17085569/17091218/17090666/17088459/17090801/17087946/17089554/17086993/17085756/17088991/17085202/17089549/17090558/17088507/17090877/17087751/17085958/17089351/17087457/17086388/17090619/17090783/17090031/17085589/17089814/17087667/17086149/17088126/17086915/17086225/17090610/17088649/17089833/17086085/17086423/17085568/17087832/170…	10	17085567/17087322/17087326/17087320/17087325/17087324/17087323/17087307/17087319/17087348
MF	GO:0016491	oxidoreductase activity	83/458	277/2551	1.42947325985541e-07	6.76617342998229e-06	17085140/17086365/17085529/17088681/17085155/17086641/17085248/17085494/17085972/17091114/17085644/17088661/17090382/17085623/17089707/17090047/17089447/17088843/17087794/17087746/17089931/17087878/17088919/17085915/17085428/17088390/17091080/17085297/17088508/17090387/17088864/17088509/17086867/17085558/17087456/17091242/17085884/17089736/17090611/17085552/17087493/17090793/17088548/17090855/170…	Gasu_62010/Gasu_50490/Gasu_57960/Gasu_27040/Gasu_61820/Gasu_47430/Gasu_60980/Gasu_58490/Gasu_53720/Gasu_03180/Gasu_56920/Gasu_26840/Gasu_11340/Gasu_57790/Gasu_17800/Gasu_13630/Gasu_19790/Gasu_24710/Gasu_35340/Gasu_36460/Gasu_15110/Gasu_34460/Gasu_25470/Gasu_54250/Gasu_59410/Gasu_30450/Gasu_02840/Gasu_60470/Gasu_29520/Gasu_11390/Gasu_24930/Gasu_29530/Gasu_44960/Gasu_58250/Gasu_39730/Gasu_00520/Gas…	83	31	17086365/17085972/17089707/17088843/17087794/17087746/17089931/17088919/17085915/17085428/17088390/17091080/17088508/17090387/17088864/17088509/17086867/17091242/17085884/17090611/17085552/17090793/17090725/17085590/17087726/17089071/17090147/17087977/17087789/17084928/17088036	52	17085140/17085529/17088681/17085155/17086641/17085248/17085494/17091114/17085644/17088661/17090382/17085623/17090047/17089447/17087878/17085297/17085558/17087456/17089736/17087493/17088548/17090855/17086742/17085531/17085017/17088086/17087689/17087360/17085050/17086741/17086117/17090248/17087287/17089808/17087297/17087292/17086212/17087336/17085338/17089219/17087288/17084869/17087302/17090489/170…
MF	GO:0022857	transmembrane transporter activity	46/458	155/2551	0.000156225347645738	0.00554599984142368	17089751/17091131/17088062/17085028/17091193/17086033/17091097/17088864/17085516/17089011/17090840/17084799/17085430/17087804/17088291/17088588/17086118/17086415/17086030/17089869/17089173/17088096/17088706/17084992/17088873/17087146/17087147/17090016/17084743/17084812/17089888/17085337/17089031/17090511/17088108/17087113/17089057/17089719/17088653/17086402/17086900/17088107/17087560/17088636/170…	Gasu_15740/Gasu_03350/Gasu_32620/Gasu_63100/Gasu_00030/Gasu_53210/Gasu_03010/Gasu_24930/Gasu_57830/Gasu_24210/Gasu_06570/Gasu_65340/Gasu_59430/Gasu_35440/Gasu_31400/Gasu_28190/Gasu_52880/Gasu_49610/Gasu_53180/Gasu_14490/Gasu_23470/Gasu_32580/Gasu_27280/Gasu_63420/Gasu_25020/Gasu_41440/Gasu_41450/Gasu_13330/Gasu_65900/Gasu_65210/Gasu_14680/Gasu_60060/Gasu_24410/Gasu_09670/Gasu_33080/Gasu_42600/Gas…	46	13	17089751/17088864/17088588/17086118/17084992/17088873/17084743/17084812/17089888/17089057/17089719/17088653/17088636	33	17091131/17088062/17085028/17091193/17086033/17091097/17085516/17089011/17090840/17084799/17085430/17087804/17088291/17086415/17086030/17089869/17089173/17088096/17088706/17087146/17087147/17090016/17085337/17089031/17090511/17088108/17087113/17086402/17086900/17088107/17087560/17087145/17085525
MF	GO:0005215	transporter activity	46/458	166/2551	0.000870095430432355	0.0247107102242789	17089751/17091131/17088062/17085028/17091193/17086033/17091097/17088864/17085516/17089011/17090840/17084799/17085430/17087804/17088291/17088588/17086118/17086415/17086030/17089869/17089173/17088096/17088706/17084992/17088873/17087146/17087147/17090016/17084743/17084812/17089888/17085337/17089031/17090511/17088108/17087113/17089057/17089719/17088653/17086402/17086900/17088107/17087560/17088636/170…	Gasu_15740/Gasu_03350/Gasu_32620/Gasu_63100/Gasu_00030/Gasu_53210/Gasu_03010/Gasu_24930/Gasu_57830/Gasu_24210/Gasu_06570/Gasu_65340/Gasu_59430/Gasu_35440/Gasu_31400/Gasu_28190/Gasu_52880/Gasu_49610/Gasu_53180/Gasu_14490/Gasu_23470/Gasu_32580/Gasu_27280/Gasu_63420/Gasu_25020/Gasu_41440/Gasu_41450/Gasu_13330/Gasu_65900/Gasu_65210/Gasu_14680/Gasu_60060/Gasu_24410/Gasu_09670/Gasu_33080/Gasu_42600/Gas…	46	13	17089751/17088864/17088588/17086118/17084992/17088873/17084743/17084812/17089888/17089057/17089719/17088653/17088636	33	17091131/17088062/17085028/17091193/17086033/17091097/17085516/17089011/17090840/17084799/17085430/17087804/17088291/17086415/17086030/17089869/17089173/17088096/17088706/17087146/17087147/17090016/17085337/17089031/17090511/17088108/17087113/17086402/17086900/17088107/17087560/17087145/17085525
MF	GO:0048037	cofactor binding	48/458	178/2551	0.00129358416487151	0.0306148252352925	17086365/17085248/17085644/17090659/17088661/17090382/17089707/17087794/17089931/17090497/17087878/17085915/17085428/17091080/17085297/17085431/17088363/17090387/17087456/17087434/17085552/17087493/17090855/17090725/17085448/17086742/17091118/17085806/17089071/17087620/17090620/17085585/17086808/17087360/17085050/17089445/17084928/17088036/17085723/17089809/17087376/17086212/17089219/17084869/170…	Gasu_50490/Gasu_60980/Gasu_56920/Gasu_08020/Gasu_26840/Gasu_11340/Gasu_17800/Gasu_35340/Gasu_15110/Gasu_09530/Gasu_34460/Gasu_54250/Gasu_59410/Gasu_02840/Gasu_60470/Gasu_59440/Gasu_30180/Gasu_11390/Gasu_39730/Gasu_39510/Gasu_58190/Gasu_38460/Gasu_06720/Gasu_05470/Gasu_58810/Gasu_46810/Gasu_03220/Gasu_55420/Gasu_22460/Gasu_38180/Gasu_07630/Gasu_57430/Gasu_45900/Gasu_40720/Gasu_62880/Gasu_19770/Gas…	48	21	17086365/17089707/17087794/17089931/17090497/17085915/17085428/17091080/17085431/17090387/17085552/17090725/17085448/17091118/17089071/17087620/17090620/17089445/17084928/17088036/17085723	27	17085248/17085644/17090659/17088661/17090382/17087878/17085297/17088363/17087456/17087434/17087493/17090855/17086742/17085806/17085585/17086808/17087360/17085050/17089809/17087376/17086212/17089219/17084869/17087302/17085893/17087372/17087315
